1 **Evolution of the quorum sensing systems in *Pseudomonas aeruginosa* can involve both loss of**  
2 **regulon function and network modulation**

3

4 Priyanikha Jayakumar<sup>1\*</sup>, Alexandre R. T. Figueiredo<sup>1,2,3</sup>, Rolf Kümmerli<sup>1\*</sup>

5

6 <sup>1</sup> Department of Quantitative Biomedicine, University of Zurich, Winterthurerstrasse 190, 8057

7 Zurich, Switzerland

8 <sup>2</sup> Department of Evolutionary Biology and Environmental Studies, University of Zurich,

9 Winterthurerstrasse 190, 8057 Zurich, Switzerland

10 <sup>3</sup> Department of Zoology, University of Oxford, 11a Mansfield Road, OX1 3SZ, Oxford, United

11 Kingdom

12

13 **\*Corresponding authors**

14 Priyanikha Jayakumar, [priyanikha.jayakumar@uzh.ch](mailto:priyanikha.jayakumar@uzh.ch); Rolf Kümmerli, [rolf.kuemmerli@uzh.ch](mailto:rolf.kuemmerli@uzh.ch)

15

16 **Running title:** Loss and modulation of quorum sensing

17

18

19

20

21

22 **Abstract**

23 *Pseudomonas aeruginosa* populations evolving in cystic fibrosis (CF) lungs, animal infection  
24 models, natural environments or *in vitro* undergo extensive genetic adaption and diversification. A  
25 common mutational target is the quorum sensing (QS) regulon, a three-unit regulatory system that  
26 controls the expression of a suite of virulence factors and secreted public goods. Three scenarios  
27 have been advocated to explain selection for QS mutants, which include (I) disuse of the regulon,  
28 (II) cheating on public goods, or (III) modulation of the network. Here, we test these scenarios by  
29 examining a set of 61 QS mutants from an experimental evolution study. We observed non-  
30 synonymous mutations in all three QS systems – Las, Rhl and PQS. Most Las mutants carried large  
31 deletions, resulting in loss of QS function, and the inability to produce QS-regulated traits (scenario  
32 I or II). Conversely, phenotypic and gene expression analyses of Rhl mutants support network  
33 modulation (scenario III), as these mutants overexpressed the Las and Rhl regulators and showed  
34 an altered QS-regulated trait production portfolio. PQS mutants also showed patterns of network  
35 modulation (scenario III), spurring strain diversification and phenotypic trade-offs, where the  
36 upregulation of certain QS traits is associated with the downregulation of others. Overall, our  
37 results indicate that mutations in different QS systems lead to diverging effects on the social  
38 portfolio of bacterial populations. These mutations might not only affect the plasticity and diversity  
39 of evolved populations but could also impact bacterial fitness and virulence in infections.

40 **Importance**

41 *Pseudomonas aeruginosa* uses quorum sensing (QS), a three-unit multi-layered network, to  
42 coordinate expression of traits for growth and virulence in the context of infections. Despite its  
43 importance for bacterial fitness, the QS regulon appears to be a common mutational target during  
44 long-term adaptation of *P. aeruginosa* in the host, natural environments and experimental  
45 evolutions. This raises the questions why such an important regulatory system is under selection  
46 and how mutations change the portfolio of QS-regulated traits. Here, we examine a set of 61  
47 naturally evolved mutants to address these questions. We found that mutations involving the master  
48 regulator, LasR, resulted in an almost complete breakdown of QS, while mutations in RhIR and  
49 PqsR resulted in modulations of the QS regulon, where both the QS regulon structure and the QS-  
50 regulated trait portfolio changed. Our work reveals that natural selection drives diversification in  
51 QS activity patterns in evolving populations.

52

53

54

## 55 **Introduction**

56 *Pseudomonas aeruginosa* is an opportunistic bacterial pathogen responsible for chronic infections,  
57 especially in individuals with the genetic disorder cystic fibrosis (CF) (Koch and Hoiby, 1993;  
58 Parkins, Somayaji and Waters, 2018). *P. aeruginosa* lineages isolated from patients are often  
59 characterized by a series of specific mutations, which have been traditionally interpreted as  
60 adaptations to the CF lung environment (Smith *et al.*, 2006; Folkesson *et al.*, 2012; Dettman *et al.*,  
61 2013). The quorum-sensing (QS) regulon is one of the commonly observed mutational hotspots  
62 (Schaber *et al.*, 2004; Smith *et al.*, 2006; Damkiær *et al.*, 2013; Marvig *et al.*, 2015; Feltner *et al.*,  
63 2016; Winstanley, O'Brien and Brockhurst, 2016). As *P. aeruginosa* uses QS to regulate a suite of  
64 virulence factors (Rumbaugh *et al.*, 1999; Pearson *et al.*, 2000; Lesprit *et al.*, 2003), it is rather  
65 surprising to see that mutations in QS regulators (often interpreted as loss-of-function mutations)  
66 are favored in an infectious context, where virulence factors are important.

67

68       QS signaling in *P. aeruginosa* is mediated by two N-acyl homoserine lactone (AHL)-  
69 dependent QS systems, the Las and Rhl systems, as well as the *Pseudomonas* Quinolone Signal  
70 (PQS) system (Williams and Cámara, 2009; Nadal Jimenez *et al.*, 2012; Lee and Zhang, 2015).  
71 Each system synthesizes its own signal (Las: 3O-C12-HSL; Rhl: C4-HSL, PQS: 2-heptyl-3-  
72 hydroxy-4-quinolone) that binds to its cognate receptor (LasR, RhlR and PqsR). Signal-receptor  
73 complexes form transcriptional regulators that control the expression of a suite of virulence factors,  
74 including a set of secreted proteases, biosurfactants, toxins, and biofilm formation. The induction  
75 of these virulence factors depends on surpassing a signal threshold concentration, which is often  
76 reached at high bacterial population densities. The QS systems are arranged in a hierarchical  
77 signaling cascade where the Las system positively regulates both the Rhl and PQS systems through  
78 the Las signal-receptor dimer complex. The PQS system also positively regulates the Rhl system,

79 but Rhl in turn inhibits the PQS system (Diggle *et al.*, 2007; Köhler, Buckling and Van Delden,  
80 2009).

81  
82 *P. aeruginosa* isolates from chronically infected CF patient lungs frequently contain  
83 mutations in the master transcriptional regulator, LasR, thereby influencing the activity of all three  
84 QS systems (Feltner *et al.*, 2016; Chen *et al.*, 2019). While initially interpreted as a specific  
85 adaptation to the CF lung environment, it has become clear that *lasR* mutants are also selected for  
86 under many other conditions, including chronic wounds (Vanderwoude *et al.*, 2020), corneal  
87 infections (Preston *et al.*, 1997; Hammond *et al.*, 2016), ventilator-associated pneumonia (Köhler,  
88 Buckling and Van Delden, 2009), infections in *Caenorhabditis elegans* (Jansen *et al.*, 2015;  
89 Granato *et al.*, 2018), as well as in the absence of a host such as in natural environments (Groleau  
90 *et al.*, 2021) and in experimental evolutions (Wilder, Diggle and Schuster, 2011; Kostylev *et al.*,  
91 2019; Scribner *et al.*, 2021; Smalley *et al.*, 2022). Why then, are *lasR* mutants consistently favored  
92 across these difference environments? Three competing hypotheses have been advocated. First,  
93 mutations in *lasR* lead to a loss of function in QS-regulated phenotypes and are favored because  
94 QS is no longer needed in the respective environments, especially during growth in rich medium  
95 (D'Argenio *et al.*, 2007). Second, QS is still required but *lasR* mutants are cheaters that no longer  
96 respond to the QS signal. They refrain from producing QS-regulated traits, yet, still benefit from  
97 the shared pool of QS-regulated traits in the environment (proteases, biosurfactants, toxins)  
98 produced by QS wild type cells (Diggle *et al.*, 2007; Köhler, Buckling and Van Delden, 2009;  
99 Rumbaugh *et al.*, 2009). Third, mutations in *lasR* may modulate the QS regulon itself by either  
100 changing its sensitivity or remodeling the hierarchal network as an adaptation to the prevailing  
101 conditions (Chen *et al.*, 2019; Kostylev *et al.*, 2019). This hypothesis has been fueled by recent

102 findings that evolved *lasR* mutants have diverse phenotypes and are not necessarily null mutants  
103 (Jansen *et al.*, 2015; Feltner *et al.*, 2016; Cruz *et al.*, 2020).

104  
105 To obtain a deeper understanding of how mutations in the QS regulon affect downstream  
106 phenotypes and QS network topology, we used a set of 61 experimentally evolved QS mutants to  
107 investigate whether these mutants have lost the ability to produce QS-regulated traits (supporting  
108 either the first or the second hypotheses) or if they show an altered QS-regulated trait expression  
109 portfolio (supporting the third hypothesis). The mutant collection stems from an experimental  
110 evolution study performed in our laboratory that focused on the evolution of iron uptake systems  
111 under various *in vitro* conditions (Figueiredo, Wagner and Kümmerli, 2021). The experiment was  
112 initiated with *P. aeruginosa* PAO1 wild type populations and ran for 200 consecutive days.  
113 Although the QS regulon was not the focus of this work, whole-genome sequencing of evolved  
114 clones revealed an accumulation of non-synonymous mutations in all three QS systems,  
115 corroborating the notion that mutations in QS systems are commonly favored in this species. In a  
116 first step, we conducted an in-depth genomic analysis on the types, size and location of mutations  
117 found in the Las, Rhl and PQS systems. Next, we screened all mutants for four QS-regulated traits  
118 to examine which type of mutations lead to a loss of function versus a modulated QS response. The  
119 four QS-regulated traits are (i) proteases, used to digest extracellular proteins, (ii) pyocyanin, a  
120 broad-spectrum toxin, (iii) rhamnolipid biosurfactants, for group-level motility and (iv) the ability  
121 to form surface-attached biofilms. Finally, we picked a subset of QS mutants with apparent QS-  
122 regulon modifications and investigated whether these mutations alter the gene expression of QS-  
123 regulators and downstream regulated traits.

124

125

## 126 **Materials and methods**

### 127 **Bacterial strains**

128 We analyzed a collection of 61 experimentally evolved *P. aeruginosa* clones from Figueiredo,  
129 Wagner and Kümmerli (2021) (Table S1). All clones have a common ancestor, the PAO1 wild type  
130 strain (ATCC 15692). We grouped the evolved clones based on the mutations accumulated in either  
131 a single (Las, Rhl or PQS systems), or in multiple QS systems. For the growth and QS-phenotype  
132 screening assays, we further used the ancestral PAO1 wild type strain and three isogenic QS  
133 mutants constructed from the same PAO1 background. The isogenic QS mutants are deficient in  
134 the production of either one of two QS receptors, LasR ( $\Delta lasR$ ), RhlR ( $\Delta rhlR$ ), or both receptors  
135 ( $\Delta lasR-\Delta rhlR$ ). These are loss of function mutants and were used as controls for the screening of  
136 QS-regulated trait production.

137 To be able to track gene expression in a subset of mutated clones ( $n = 5$ ), we engineered  
138 double fluorescent transcriptional reporter fusions to measure the simultaneous expression of (1)  
139 *lasR-gfp* and *rhlR-mCherry*, and (2) *lasB-gfp* and *rhlA-mCherry*. A single copy of the double  
140 reporter construct was chromosomally integrated in the experimentally evolved clones at the  
141 neutral attTn7 site using the mini-Tn7 system (Choi and Schweizer, 2006). Detailed step-by-step  
142 cloning protocol is described elsewhere (Jayakumar et al., 2021). We used *Escherichia coli* CC118  
143  $\lambda$ pir for all intermediary steps in our cloning work (see Table S2 for a full list of non-experimentally  
144 evolved strains and plasmids used).

145

### 146 **Experimental evolution**

147 The protocol of the experimental evolution study is described in detail elsewhere (Figueiredo,  
148 Wagner and Kümmerli, 2021). Briefly, experimental cultures were initiated with ancestral PAO1,

149 and evolving populations were propagated for 200 consecutive days, during which approximately  
150 1,200 generations occurred. Evolving populations were cultured in casamino acid (CAA) medium  
151 (5 g/L casamino acids, 1.18 g/L  $K_2HPO_4 \cdot 3H_2O$ , 0.25 g/L  $MgSO_4 \cdot 7H_2O$ , 25 mm HEPES buffer)  
152 with varying iron availabilities (no  $FeCl_3$  added, 2  $\mu m$   $FeCl_3$ , or 20  $\mu m$   $FeCl_3$  to achieve conditions  
153 of low, intermediate and high iron availability, respectively) and environmental viscosities (0%,  
154 0.1% or 0.2% [weight/volume] agar to represent low, mid or high spatial structure, respectively).  
155 While these environmental conditions were important for the initial study design, they do not serve  
156 purpose for the current study, as QS mutants arose in all nine environments.

157

### 158 **Bioinformatical analysis**

159 Figueiredo et al. (2021) sequenced the whole genome of 119 evolved clones, among which 61  
160 (51.2%) had mutations in genes of the QS regulons. Experimentally evolved clones were sequenced  
161 on the Illumina NovaSeq6000 platform (paired-end, 150 base-pair reads). Single nucleotide  
162 polymorphisms (SNPs) and microindels (small insertions and deletions) were detected by aligning  
163 the obtained reads to the *P. aeruginosa* PAO1 reference genome with the BWA “mem” algorithm  
164 followed by variant-calling with BCFTOOLS and annotation with SNPEFF. Large deletions and  
165 duplications were detected with CLC Genomics Workbench. Details on the bioinformatic analysis  
166 are described in Figueiredo, Wagner and Kümmerli (2021).

167

168 To map the position of SNPs and microindels within each QS gene, we compared the  
169 sequenced genome of the single evolved clones to the *P. aeruginosa* PAO1 reference genome on  
170 [www.pseudomonas.com](http://www.pseudomonas.com). Using published protein database of the QS signal-receptor complexes  
171 on InterProScan, we further obtained the classification of protein families and domains and  
172 extracted the information on the amino acid residues of the ligand- and DNA-binding domains of



173 the Las, Rhl and PQS transcriptional regulator complexes. Finally, to evaluate mutational hotspots,  
174 we mapped the position of the evolved mutations to the reference gene sequence of *lasR*, *rhlR* and  
175 *pqsR*.

176

### 177 **Growth measurements**

178 For all experiments, we pre-cultured single clones from freezer stocks in 6 ml Lysogeny Broth  
179 (LB), at 37°C, 220 rpm for 18 hours. Prior to experiments, we washed overnight cultures twice  
180 with 0.8% NaCl and adjusted to an optical density at 600 nm (OD<sub>600</sub>) of 1. To measure growth, we  
181 inoculated cells from overnight pre-cultures into fresh 1.5 mL LB medium to a final starting OD<sub>600</sub>  
182 of 0.01 in 24-well plates and incubated them at 37°C for 24 hours under shaken conditions  
183 (170rpm). The reasoning of this experiment was to obtain a proxy for fitness for all evolved clones  
184 relative to the ancestor in a standard medium, where the QS network is induced, but not essential  
185 (Jayakumar *et al.*, 2021). After 24 hours, we measured growth as OD<sub>600</sub> in a microplate reader  
186 (Tecan Infinite M-200, Switzerland).

187

### 188 **Pyocyanin production**

189 To measure the production of pyocyanin, we collected the bacterial cultures after 24h of growth in  
190 LB medium (described above) in 2 mL reaction tubes. We thoroughly vortexed, and centrifuged  
191 them at 12,000 g for 10 minutes to pellet bacterial cells. We then transferred the cell-free  
192 supernatants to fresh 2 mL reaction tubes. For each clone, we transferred four aliquots of 200 µL  
193 of the cell-free supernatant to 96-well plates, and quantified pyocyanin by measuring optical  
194 density at 691 nm in a microplate reader. LB medium was used as a blank control.

195

196

## 197 **Rhamnolipid production via drop collapse assay**

198 We used the drop collapse assay to measure the production of rhamnolipids. We collected cell-free  
199 supernatant of bacterial cultures grown in LB medium as described above. For each clone, we  
200 plated 5  $\mu$ L of the cell-free supernatant on the lids of 96-well plates and measured the droplet  
201 surface area after one minute (Kramer, López Carrasco and Kümmerli, 2020). Surface tension  
202 decreases with increasing concentrations of biosurfactant in the supernatant, therefore resulting in  
203 the collapse of droplets (Bodour and Miller-Maier, 1998). We took pictures of the lids and  
204 measured droplet surface area with the Image Analysis Software *ImageJ*. LB medium was used as  
205 a blank control. To quantify biosurfactant production based on droplet surface area, we made a  
206 calibration curve with a known range of synthetic rhamnolipid (Sigma-Aldrich, Switzerland)  
207 concentrations (ranging from 0-0.2 g/L) and measured their respective droplet surface area.

208

## 209 **Protease production**

210 We used the azocasein assay to measure protease production. For this, we inoculated cells from  
211 overnight pre-cultures into 1.5 mL casein medium (5 g/L casein from bovine milk, 1.18 g/L  
212  $K_2HPO_4 \cdot 3H_2O$ , 0.25 g/L  $MgSO_4 \cdot 7H_2O$ ) to a final starting  $OD_{600}$  of 0.01 in 24-well plates, and  
213 incubated cultures at 37°C for 48 hours under shaken conditions (170rpm). After 48 hours, we  
214 transferred the bacterial cultures to 2 mL reaction tubes, vortexed thoroughly, and centrifuged at  
215 12,000 g for 10 minutes to pellet bacterial cells. Next, we transferred the cell-free supernatants to  
216 fresh 2 mL reaction tubes. We first treated aliquots of 40  $\mu$ L cell-free supernatants with 120  $\mu$ L  
217 phosphate buffer (50 Mm, pH  $\approx$  7.5) and 40  $\mu$ L azocasein (30 mg/mL), and subsequently incubated  
218 them at 37°C for 30 minutes. We stopped the reaction with 200  $\mu$ L trichloroacetic acid (20 %). We  
219 centrifuged treated supernatants at 12,000 g for 10 minutes and collected and transferred fresh  
220 supernatants into new 96-well plates. We quantified protease production as optical density at 366

221 nm in a microplate reader. Casein medium treated with azocasein was used as a blank control. All  
222 media components were purchased from Sigma-Aldrich, Switzerland.

223

#### 224 **Biofilm measurements**

225 We used the crystal violet assay to measure the ability of evolved clones to form surface-attached  
226 biofilms. We prepared overnight pre-cultures of single clones from freezer stocks in 200  $\mu$ L LB  
227 medium in 96-well plates and incubated them at 37°C under static condition for 24 hours. We  
228 measured the growth of pre-cultures at OD<sub>600</sub> using a microplate reader. Then, we diluted the pre-  
229 cultures to a starting OD<sub>600</sub> of 0.01 in fresh 100  $\mu$ L LB medium in a 96-well round bottom plate  
230 (No. 83.3925.500, Sarstedt, Germany) and incubated at 37°C under static conditions for 24 hours.  
231 Subsequently, we carefully transferred the cultures to a fresh flat-bottom 96-well plate and  
232 measured growth at OD<sub>600</sub> in a microplate reader. We added 100  $\mu$ L of 0.1% crystal violet to each  
233 well of the round bottom plate to stain the surface-attached biofilm and incubated the plates at room  
234 temperature for 30 minutes. Then, we carefully washed the wells twice with ddH<sub>2</sub>O to remove the  
235 crystal violet solution and left them to dry at room temperature for 15 minutes. Next, we added 120  
236  $\mu$ L of dimethyl sulfoxide (DMSO) to each well to solubilize the stained biofilm and incubated the  
237 reaction at room temperature for 20 minutes. Finally, we measured optical density at 570 nm in a  
238 microplate reader, and the production of surface-attached biofilm was quantified by calculating the  
239 “Biofilm Index” (OD<sub>570</sub>/ OD<sub>600</sub>) for each well (Savoia and Zucca, 2007). LB medium treated with  
240 crystal violet and DMSO was used as a blank control.

241

#### 242 **Gene expression measurement**

243 We inoculated fluorescent gene reporter cells from overnight cultures into fresh LB medium to a  
244 final starting OD<sub>600</sub> of 0.01 in individual wells on 96-well plates. Plates were incubated at 37°C in

245 a microplate reader. We measured mCherry fluorescence (excitation: 582 nm, emission: 620 nm),  
246 GFP fluorescence (excitation: 488 nm, emission: 520 nm) and growth (OD<sub>600</sub>) every 15 minutes  
247 (after a shaking event of 15 seconds) over a duration of 24 hours. To remove background  
248 fluorescence, we measured the mean fluorescence intensity of the untagged PAO1 wild type strain  
249 in the mCherry and the GFP channels across time and subtracted these values from the measured  
250 mCherry and GFP fluorescence values of the QS gene reporter strains at each time point.

251

## 252 **Statistical analysis**

253 We performed all statistical analyses with R studio (version 3.6.1). For all datasets, we consulted  
254 Q-Q plots and the Shapiro-Wilk test to examine whether the residuals were normally distributed.  
255 We used one-way ANOVA and post-hoc Tukey's HSD to compare growth and QS-regulated traits  
256 between the different mutant categories, and between the mutant categories and the ancestral wild  
257 type. We performed a principal component analysis (PCA) on the clonal phenotypes using the  
258 vegan package in R (version 2.5-7) (Oksanen *et al.*, 2020). We further tested whether mutant  
259 categories differ in their evolved QS trait profile using permutational multivariate analysis of  
260 variance (PERMANOVA). To compare gene expression trajectories, we fitted a parametric growth  
261 model (logistic model) in R and extracted the area under the curve (AUC) of each clone. Then, we  
262 used one-way ANOVA to compare the AUC between the mutant categories.

263

## 264 **Results**

### 265 **Mutational patterns across the three QS regulons of *P. aeruginosa***

266 Among the 61 evolved clones, we found 68 mutations in genes of the three QS regulon (see Table  
267 1 for an overview and Table S1 for individual clones). We detected 29 large-scale deletions (>4,903  
268 bp), 30 single nucleotide polymorphisms (SNPs), and 9 microindels representing small deletions

269 (max 12 bp) in the genes within the Las, Rhl and PQS systems. Most mutations were observed  
270 within the Las system (n=35), followed by the PQS (n=28) and Rhl (n=5) systems.

271

### 272 *Mutations within the Las regulon*

273 The majority of mutations in the Las regulon entail large-scale deletions (n = 29, 82.9%, ranging  
274 from 4,903 bp to 65,969 bp), where the Las signal synthase (*lasI*), the negative repressor (*rsaL*)  
275 and the Las receptor (*lasR*) were deleted, in addition to other genes. The exact position and size of  
276 the deletions are shown in Fig. 1A. In contrast, we only found a small number of SNPs (n = 6, 17.1  
277 %) in the *lasR* receptor, of which five are located in the same region of the DNA binding domain  
278 (Fig. 1B). The single mutant that has a SNP at a different location also has a mutation in the PQS  
279 system.

280

### 281 *Mutations within the Rhl regulon*

282 In total, we found five SNPs in the gene coding for the Rhl receptor (*rhlR*). Two of the five mutants  
283 also have SNPs in the PQS system. Although the numbers are too few to obtain a conclusive pattern  
284 on the location of mutations, we found that the three clones that only had *rhlR* mutated all have  
285 SNPs in the ligand-binding site of *rhlR* (Fig. 1B). Meanwhile, the two *rhlR*-PQS double mutants  
286 have their SNPs outside the ligand-binding site.

287

### 288 *Mutations within the PQS regulon*

289 Out of the 26 clones with mutations in the PQS system, 19 have single mutations within the PQS  
290 regulon, 2 clones have double mutations within the PQS regulon, while 5 clones share one other  
291 mutation in either the Las or the Rhl system. Altogether, there were 28 mutations, comprising of 2  
292 SNPs and 1 microindel in the PQS signal operon (*pqsABCD*), 4 SNPs in the *pqsE* gene and 13

293 SNPs and 8 microindels in the gene encoding the PQS receptor (*pqsR*). When mapping the  
294 mutations in *pqsR*, we found that the SNPs and microindels occurred both in the DNA- and the  
295 ligand-binding domains (Fig. 1B).

296

### 297 **QS system-specific mutations drive divergence in the production of QS-regulated traits**

298 Next, we explored how mutations in the Las, Rhl and PQS regulons link to growth and QS trait  
299 expression (proteases, rhamnolipids, pyocyanin and biofilm). We grouped mutants into five  
300 categories: (i) clones with mutations in the Las receptor, *lasR*, and large-scale Las deletions (these  
301 two classes were combined because there was no difference in their phenotypes); (ii) clones with  
302 mutations in the Rhl regulon alone; (iii) clones with mutations in the PQS regulon alone; (iv) clones  
303 with mutations in the Las and the PQS regulons; (v) clones with mutations in the Rhl and the PQS  
304 regulons. For the statistical analysis, we further included the ancestral wild type as sixth category  
305 and compared whether there are significant differences in growth and QS-regulated trait production  
306 between the mutant categories and the wild type, as well as between the five mutant categories.

307

308 Our growth assay in LB medium revealed no significant difference in endpoint growth  
309 between any of the five mutant categories and the ancestral wild type (Fig. 2A, one-way ANOVA,  
310  $F_{5,177} = 0.587$ ,  $p = 0.710$ ). However, there were considerable differences in growth performance  
311 between evolved clones within certain mutant categories, especially among those with mutations  
312 in the Las regulon.

313

314 For proteases, we found significant differences in the production levels across the five  
315 mutant categories and the ancestral wild type (Fig. 2B, one-way ANOVA,  $F_{5,156} = 20.388$ ,  $p <$   
316  $0.001$ ). All clones with mutations in the Las system (including the Las-PQS double mutants) had

317 lower protease production compared to the ancestral wild type, with most clones having almost  
318 completely abolished production, similar to the lab-generated *lasR* mutant. Meanwhile, all clones  
319 with mutations in the Rhl system (including the Rhl-PQS double mutants) produce higher amounts  
320 of proteases than the ancestral wild type. This observation is diametrically opposite to the pattern  
321 seen in the lab-generated *rhlR* mutant, which does not produce proteases. Clones with mutations  
322 in the PQS system displayed a bimodal phenotypic profile: 14 produced almost no proteases, while  
323 7 clones had a similar or higher protease production level than the ancestral wild type.

324  
325 Pyocyanin production is significantly reduced in all mutant categories as compared to the  
326 ancestral wild type (Fig. 2C, one-way ANOVA,  $F_{5,191} = 70.212$ ,  $p < 0.001$ , all pairs tested with  
327 post-hoc Tukey HSD show  $P_{\text{adj}} < 0.001$ ), but there are no significant differences between the mutant  
328 categories (all pairs tested with post-hoc Tukey HSD show  $P_{\text{adj}} > 0.500$ ).

329  
330 Rhamnolipid production was also significantly reduced in all mutant categories relative to  
331 the ancestral wild type (Fig. 2D, one-way ANOVA,  $F_{5,191} = 49.003$ ,  $p < 0.001$ , all pairs tested with  
332 post-hoc Tukey HSD show  $P_{\text{adj}} < 0.001$ ). But this time, we also observed significant differences in  
333 the production of rhamnolipids between the mutant categories (post-hoc Tukey HSD test, Las  
334 versus PQS and Las versus Las + PQS,  $P_{\text{adj}} < 0.001$ ; Rhl versus Rhl + PQS,  $P_{\text{adj}} = 0.009$ ). Clones  
335 with mutations in the PQS system stood out from the other categories because they showed  
336 enormous variability in rhamnolipid production spanning the entire continuum from zero to levels  
337 almost identical to the ancestral wild type.

338  
339 Finally, when looking at the ability of these clones to form surface-attached biofilms, we  
340 found significant differences in biofilm production between the five mutant categories and the

341 ancestral wild type (Fig. 2E, one-way ANOVA,  $F_{5,191} = 14.502$ ,  $p < 0.001$ ). While clones with Las  
342 mutations showed significantly reduced biofilm formation compared to the ancestral wild type  
343 (post-hoc Tukey HSD test, Las versus wild type,  $P_{\text{adj}} = 0.001$ ; Las + PQS versus wild type,  $P_{\text{adj}} =$   
344  $0.012$ ), clones with Rhl and PQS mutations were on average not different from the ancestral wild  
345 type (post-hoc Tukey HSD test, Rhl versus wild type,  $P_{\text{adj}} = 0.859$ ; PQS versus wild type,  $P_{\text{adj}} =$   
346  $1.000$ ). However, we observed again enormous variability among PQS mutants: while some  
347 mutants show extremely reduced biofilm formation, others invest considerably more into this trait  
348 compared to the ancestral wildtype.

349  
350 The above findings suggest that mutations in the Las regulon spur broad-scale loss of  
351 function of QS traits, while mutations in the Rhl and PQS regulon modulate the QS-regulated trait  
352 expression patterns. To explore the apparent phenotypic segregation between mutant categories,  
353 we performed a principal component analysis (PCA) incorporating all five phenotypes into a single  
354 analysis (Fig. 2F). We found that the evolved clones significantly clustered based on the mutant  
355 categories (PERMANOVA;  $F_{4,60} = 28.167$ ,  $p = 0.001$ ). When focusing on the loadings of the first  
356 two principal components (PCs) (i.e., vectors in Fig. 2F, Table S3), we can identify two trade-offs  
357 among the QS-regulated traits. PC1 yields a trade-off between planktonic growth and biofilm  
358 formation as well as rhamnolipid production, meaning that evolved clones producing higher  
359 amounts of biofilm matrix components and rhamnolipids tend to grow less well in planktonic  
360 cultures. PC2 reveals a trade-off between protease and pyocyanin production, indicating that  
361 evolved clones that produce higher levels of proteases make lower levels of pyocyanin and vice  
362 versa. At the global level, we can conclude that modulation in the production of QS traits seems to  
363 be guided by trade-offs, meaning that maintaining or increasing the expression of one QS trait is  
364 associated with a proportional reduction of another QS trait. As QS modulations seem to be most



365 marked among Rhl and PQS mutants, we focus more closely on these two QS systems in the next  
366 sections.

367

### 368 **Modulation of the Rhl regulon**

369 All the three clones that have SNPs in the Rhl receptor, RhlR, have highly upregulated protease  
370 production, downregulated pyocyanin and rhamnolipid production, but retained wild type level  
371 formation of surface-attached biofilm. This phenotypic profile points towards QS regulon  
372 modulation, where the trait portfolio of these clones has changed. Here, we hypothesize that these  
373 phenotypic modulations should be reflected at the gene expression level. To test this, we used  
374 double fluorescent gene reporters to simultaneously measure transcriptional gene expression  
375 activity of *rhlR* and the receptor of the upstream Las system, *lasR*, in these three clones over a  
376 growth period of 24 hours in LB medium (Fig. 3A, Table S4). We found that mutations in *rhlR*  
377 significantly upregulated the expression of its own gene as compared to the wild type strain (one-  
378 way ANOVA:  $F_{2,33} = 54.950$ ,  $p < 0.001$ ; post-hoc Tukey HSD test,  $P_{\text{adj}} < 0.001$ ). However, this  
379 upregulation did not occur in the two clones that had mutations in *pqsR* in addition to *rhlR*  
380 mutations (post-hoc Tukey HSD test,  $P_{\text{adj}} = 0.971$ ). Curiously, we found that *lasR* expression was  
381 also significantly increased in clones with mutations in *rhlR*, and in one of the two clones with  
382 mutations in both *rhlR* and *pqsR* (one-way ANOVA,  $F_{2,33} = 22.554$ ,  $p < 0.001$ ). The expression  
383 trajectory of *lasR* in the four overexpressing clones follows a cyclical pattern with two successive  
384 expression peaks at hours 10 and 18. The second peak coincides with the expression peak observed  
385 in *rhlR*. Taken together, our results reveal that point mutations in *rhlR* can lead to highly increased  
386 gene expression levels of the QS receptors RhlR and LasR.

387

388 Increased expression of QS receptors could lead to higher transcriptional regulator activity  
389 within the QS network, and further translate to an increased expression of the downstream QS  
390 genes (Fig. 3B). To test this hypothesis, we measured the expression of *lasB*, a protease regulated  
391 by both the Las and Rhl systems (Schuster, Urbanowski and Greenberg, 2004), and *rhIA*, part of  
392 the RhlAB rhamnolipid operon regulated by the Rhl system (Lequette and Greenberg, 2005). We  
393 found no support for our hypothesis, as the *lasB* expression level was reduced in all the five clones  
394 (one-way ANOVA,  $F_{2,33} = 1204.4$ ,  $p < 0.001$ ; post-hoc Tukey HSD test for all pairs,  $P_{adj} < 0.001$ ).  
395 Similarly, we found strongly reduced expression of *rhIA* in all the five clones, with some of the  
396 expression levels being close to zero (one-way ANOVA,  $F_{2,33} = 8046.8$ ,  $p < 0.001$ ; post-hoc Tukey  
397 HSD test for all pairs,  $P_{adj} < 0.001$ ). These findings show that the increased expression of the LasR  
398 and RhlR QS receptors do not translate into increased expression of two downstream regulated QS-  
399 traits, LasB protease and rhamnolipid synthesis enzymes. For *rhIA*, our gene expression results are  
400 compatible with the phenotypic data, as all mutants showed greatly reduced rhamnolipid  
401 production. For *lasB*, our gene expression results suggest that other proteases than LasB must be  
402 responsible for the observed high protease production at the phenotypic level.

403

#### 404 **Modulation of the PQS regulon**

405 Our phenotypic screening from Figure 2 revealed that mutations in the PQS system result in the  
406 most variable changes in the QS-regulated traits, with several clones showing an upregulation of  
407 QS traits. Here, we focus on the 21 clones that have mutations only in the PQS system to explore  
408 whether evolved QS phenotypes depend on the mutated gene within the PQS locus, and whether  
409 there are trade-offs, where the upregulation of one QS trait results in the downregulation of another  
410 one. Accordingly, we split the clones based on the mutated sites: PQS signal operon (*pqsABCD*  
411 and *pqsE*), PQS transcriptional regulator (*pqsR*) and double mutants and re-run our phenotypic

412 analysis (Fig. 4A-E). We found that sample size was too small for most categories to reliably  
413 establish relationships between phenotypes and mutational patterns. However, when conducting a  
414 PCA with all clones we found that the evolved phenotypic profiles differed significantly between  
415 the mutation sites within the PQS regulon (PERMANOVA;  $F_{3,20} = 2.712$ ,  $p = 0.031$ , Fig. 4F). We  
416 further observed two trade-offs among traits (Fig. 4F, Table S5). First, clones with higher levels of  
417 protease production and biofilm formation produced less pyocyanin (Fig. S1 A-B). Second, clones  
418 with higher levels of biofilm formation had lower growth in planktonic culture (Fig. S1 C).

419  
420 Finally, we had a closer look at the clones with mutations in *pqsR*, which represent the most  
421 frequent mutant type and show the highest variability for most phenotypes. Especially, the bimodal  
422 profile of protease production observed in Figure 2 is prevalent among the *pqsR* mutants (Fig. 4B).  
423 Here, we tested whether the divergent trajectories across *pqsR* mutants are linked to the location of  
424 the mutations (ligand- (LDB) versus DNA- (DBD) binding domain), or the type of mutations with  
425 regard to their deleterious effects (missense versus frameshift/deletions) (Table S6). However, we  
426 found that neither of these two factors can explain the bimodal protease production profiles  
427 (Fisher's exact test: location of mutations,  $p = 1$ , type of mutations,  $p = 0.608$ ).

428

## 429 **Discussion**

430 As an important human pathogen, the evolution of *Pseudomonas aeruginosa* populations has been  
431 studied in a myriad of context, with extensive genetic adaptation being repeatedly observed in  
432 diverging environments such as human cystic fibrosis (CF) lungs, animal infection models, as well  
433 as in the natural environments and *in vitro* experimental evolutions (Rumbaugh *et al.*, 2009; Jansen  
434 *et al.*, 2015; Feltner *et al.*, 2016; Granato *et al.*, 2018; Groleau *et al.*, 2021; Scribner *et al.*, 2021;  
435 Smalley *et al.*, 2022). The quorum sensing (QS) regulon, a global three-unit regulatory system that

436 controls the expression of up to 10% of the genes in *P. aeruginosa*, many of which include  
437 virulence factors, is often among the most mutated pathways. It remains unclear why mutations in  
438 the QS regulon are consistently favored across different environments. QS mutants could arise and  
439 spread due to (I) disuse of the regulon, (II) cheating on the cooperative benefits of QS, or (III)  
440 modulation of one or several of the three systems. Here, we used a set of 61 experimentally evolved  
441 QS mutants (with mutations in the three systems: Las, Rhl and PQS) to examine these three  
442 scenarios. We found a clear distinction between the QS systems in how mutations affected the  
443 production of QS-regulated traits. While mutations in the Las system generally resulted in the loss  
444 of QS function (supporting scenarios I and II), mutations in the Rhl and PQS systems resulted in  
445 an altered trait production portfolio and regulatory network modulations (supporting scenario III).

446  
447         The mutational and phenotypic patterns observed in the Las mutants strongly point towards  
448 loss of QS function as opposed to regulon modulation. Our findings are partially in contrast with  
449 previous studies showing that Las mutants can retain QS activity, partly through re-wiring the QS  
450 network (Feltner *et al.*, 2016; Chen *et al.*, 2019; Kostylev *et al.*, 2019). We suggest that the  
451 difference in our findings is driven by the fact that we predominantly found large-scale deletions  
452 of the Las system, where the signal synthase (*lasI*), repressor (*rsaL*) and regulator (*lasR*) are  
453 deleted, therefore, leading to a loss of QS function. There is increasing evidence that large-scale  
454 deletions of the Las system are common in *in vitro* experimental evolution (O'Brien *et al.*, 2017;  
455 Scribner *et al.*, 2021; Tostado-Islas *et al.*, 2021), but might have been overlooked in the past due  
456 to computational challenges of identifying them in draft genomes produced by short-read  
457 sequencing. Given that these large-scale deletions occurred many times independently, they must  
458 have an adaptive advantage. Similar large-scale deletions have previously been associated with  
459 both cheating and loss due to disuse in the process of medium adaptation (O'Brien *et al.*, 2017;

460 Scribner *et al.*, 2021; Tostado-Islas *et al.*, 2021). In our case, the QS mutants emerged from wild  
461 type populations that had been experimentally evolved in casamino acid medium, predominantly  
462 consisting of digested amino acids, an environment in which classic QS-regulated traits such as  
463 proteases and rhamnolipids are not needed. Thus, disuse is a plausible explanation for the selective  
464 spread of these mutants, even more so because the loss of QS fostered increased production of the  
465 siderophore pyoverdine, which was beneficial in the context of the initial study (Figueiredo,  
466 Wagner and Kümmerli, 2021). Taken together, whether loss of the Las system is caused by disuse  
467 or cheating is often context-dependent and spurred by the relative costs and benefits of the QS  
468 system in the respective environment.

469  
470 We found surprisingly few mutants with point mutations in *lasR* compared to other studies  
471 (Smith *et al.*, 2006; Jansen *et al.*, 2015; Granato *et al.*, 2018; Chen *et al.*, 2019). Such mutants are  
472 likely to produce structural variants of the LasR master regulator, which could form the basis of  
473 QS regulon modulation. However, we found little evidence for this, as our clones with point  
474 mutations in *lasR* showed similar trait portfolios as the large-scale Las deletion mutants with  
475 greatly reduced or completely abolished production of QS-regulated traits (Fig. 2). Thus, they are  
476 most likely loss-of-function mutants that spread because of either disuse or cheating. In the latter  
477 case, they can be considered as signal-blind (*lasR*) mutants that save the costs of cooperating while  
478 exploiting the cooperative signaling and exoproduct production by QS-wild type individuals (West  
479 *et al.*, 2006; Diggle *et al.*, 2007; Wilder, Diggle and Schuster, 2011).

480  
481 In contrast, we found evidence for QS regulon modulation in the Rhl mutants. These  
482 mutants arose at a much lower frequency than the Las mutants, similar to previous studies  
483 (Bjarnsholt *et al.*, 2010; Ahmed *et al.*, 2021). Both the phenotypic profiles and gene expression

484 analyses revealed that there is no complete loss of QS function, but rather a change in the  
485 expression of the QS-regulated trait portfolio. At the phenotypic level, the regulon modulation is  
486 characterized by upregulating protease production and downregulating pyocyanin and rhamnolipid  
487 production, while retaining the ability to form surface-attached biofilms at levels similar to the  
488 ancestral wild type. This points towards possible decoupling of certain elements from the QS  
489 regulon. A straightforward explanation would be that mutations in *rhlR* abolish the production of  
490 traits that are directly controlled by the Rhl system like phenazines and rhamnolipids, whilst  
491 maintaining the traits that are predominantly under the control of the hierarchically superior Las  
492 system like proteases. However, our data speak against this explanation as we found largely  
493 increased protease production and significantly increased *rhlR* and *lasR* gene expression (Fig. 3),  
494 suggesting that the QS regulon is modulated in a more complicated way. One alternative  
495 explanation is that mutations in *rhlR* give rise to RhlR receptor variants that, upon binding to the  
496 signal, show altered transcriptional factor affinities to promoter binding sites. In other words,  
497 mutated RhlR variants could trigger increased expression of certain traits (including its own  
498 expression), while others are downregulated. Such regulon modulations seem to take non-linear  
499 paths as indicated by our data showing that increased *rhlR* expression is associated with increased  
500 *lasR* expression, but decreased expression of *lasB*, which is directly controlled by LasR. This  
501 finding matches our observation in the wild type *P. aeruginosa*, where we found high levels of  
502 *lasR* expression in a fraction of clonal cells is associated with low *lasB* expression (Jayakumar *et*  
503 *al.*, 2021). However, reduced expression levels of *lasB* do not correspond with our observation that  
504 these Rhl mutants have higher protease production (Fig. 2), suggesting that other important QS-  
505 regulated proteases, such as LasA and AprA (Gambello, Kaye and Iglewski, 1993; Coin *et al.*,  
506 1997) might be upregulated instead of LasB. Taken together, while we found evidence for

507 mutations in *rhlR* leading to QS modulation, further research is required to unravel its complex  
508 causes and consequences.

509

510 Our analysis on PQS mutants reveal that these mutants are quite common (similar in  
511 frequency to the Las mutants) and show clear evidence for QS regulon modulation rather than loss  
512 of QS function. Unlike the Rhl mutants that all had similar changes in their trait production  
513 portfolio, the PQS mutants instead show a heterogeneous profile, with phenotypic trade-offs  
514 between some of the QS-regulated traits. For example, while a subset of PQS mutants produces  
515 higher amounts of surface-attached biofilms, others grow better in planktonic cultures or produce  
516 higher amounts of pyocyanin. At the same time, the PQS mutants segregate along a continuum  
517 from low protease but high pyocyanin production to high protease but low pyocyanin production.  
518 These phenotypic trade-offs open two interesting possibilities, namely when mutants with  
519 opposing phenotypes occur in the same population. First, the different mutations in the PQS  
520 regulon could spur diversification, whereby the various mutants follow successful strategies in  
521 different ecological niches. Second, mutants with diverging phenotypes may each specialize in the  
522 production of a set of QS-regulated traits and share these traits with the other specialists at the  
523 group level. While our sample size is too small to draw strong conclusions, we indeed found cases  
524 where such phenotypically divergent clones occur in the same population (Fig. S1). As for the Las  
525 and the Rhl systems, we observed that the large majority of mutations occurred in *pqsR*, that  
526 encodes for the regulator of the PQS system. Therefore, we propose that mutations in this gene  
527 results in PqsR receptor variants that in combination with the signal show differential affinities as  
528 transcription factor, leading to the increased expression of certain traits and the downregulation of  
529 other traits. But interestingly, and different from the Las and Rhl systems, we also found mutations  
530 in other genes of the PQS regulon (*pqsABCD* and *pqsE*), which seem to contribute to the

531 diversification observed at the phenotypic level (Fig. 4). As with the Rhl mutants, modulation of  
532 the PQS network is indeed intricate and further genetic work is required to elucidate the exact  
533 regulatory trajectories that drive the altered trait expression profile among the PQS mutants.

534  
535 Finally, we also had a low number of clones with mutations in two QS systems (Las + PQS,  
536 n = 2; Rhl + PQS, n = 2). Phenotypes of the Las + PQS mutants seem to be dominated by mutations  
537 in the Las system, leading to loss of QS function. Similarly, the phenotypes of Rhl + PQS mutants  
538 point more towards loss of QS function rather than regulon modulation. For example, while single  
539 Rhl or PQS mutants produce rhamnolipids and can form surface-attached biofilms, albeit at varying  
540 levels, the double mutants show abolished phenotypes. The damping of QS modulation in double  
541 mutants is also observed at the gene expression level, where the Rhl + PQS mutants did not show  
542 an increased *rhlR* expression as observed for the Rhl single mutants (Fig. 3). This indicates that an  
543 active PQS system is required for the regulon modulation to work in Rhl mutants. Our results are  
544 in line with previous studies reporting that mutation in the PQS regulon can result in a partial loss  
545 of Rhl activity, most likely through the disruption of an alternative signaling molecule that is  
546 recognized by RhlR (Mukherjee *et al.*, 2018; Kostylev *et al.*, 2019).

547  
548 In conclusion, our results reinforce the view that QS is under selection not only in infections  
549 but also in *in vitro* experimental evolution. We show that mutational patterns and resulting  
550 phenotypes are complex. While mutations in the Las system typically are associated with loss of  
551 QS function, we find that mutations in the Rhl and PQS systems lead to regulon modifications. The  
552 idea that QS network can evolve and be rewired to match prevailing conditions in the laboratory  
553 and the host has only recently emerged (Jansen *et al.*, 2015; Feltner *et al.*, 2016; Oshri *et al.*, 2018;  
554 Chen *et al.*, 2019; Kostylev *et al.*, 2019). Here, we lend support to this hypothesis. The next goal



555 is to understand how QS regulon modulation affects the plasticity and flexibility in coordinating  
556 the social phenotypes in *P. aeruginosa* and what the consequences of QS modulation are for  
557 bacterial fitness and virulence in the host. Our study yields first indications that modulation may  
558 drive strain diversification and adaptation to different ecological niches and may perhaps also foster  
559 mutualist interactions between emerging strains (Rezzoagli, Granato and Kümmerli, 2020). Future  
560 research should investigate these aspects and extend the search for mutations to accessory  
561 regulatory elements of the QS network, such as VqsM, AlgR and Vfr (Morici *et al.*, 2007;  
562 Folkesson *et al.*, 2012; Liang *et al.*, 2014), which may further contribute to regulon modulation.

563

#### 564 **Acknowledgements**

565 We thank Richard Allen for help with statistical analysis. This work was funded by the European  
566 Research Council (ERC) under the European Union’s Horizon 2020 research and innovation  
567 program (grant agreement no. 681295), the Swiss National Science Foundation (grant no.  
568 31003A\_182499), and a grant from the University Research Priority Program “Evolution in  
569 Action”.

570

571

#### 572 **Author contribution**

573 P.J., A.R.T.F. and R.K. designed the study; P.J. performed the experiments and analysed the data;  
574 P.J., A.R.T.F. and R.K. interpreted the data and wrote the paper.

575

#### 576 **Conflict of interest**

577 The authors declare that they have no competing interests.

578

## 579 **References**

- 580 Ahmed, S. A. K. S. *et al.* (2021) ‘*Pseudomonas aeruginosa* PA80 is a cystic fibrosis isolate  
581 deficient in RhlRI quorum sensing’, *Scientific Reports*, 11(1), p. 5729. doi: 10.1038/s41598-021-  
582 85100-0.
- 583 Bjarnsholt, T. *et al.* (2010) ‘Quorum sensing and virulence of *Pseudomonas aeruginosa* during  
584 lung infection of cystic fibrosis patients’, *PLoS ONE*. PLoS One, 5(4). doi:  
585 10.1371/journal.pone.0010115.
- 586 Bodour, A. A. and Miller-Maier, R. M. (1998) ‘Application of a modified drop-collapse technique  
587 for surfactant quantitation and screening of biosurfactant-producing microorganisms’, *Journal of*  
588 *Microbiological Methods*. Elsevier, 32(3), pp. 273–280. doi: 10.1016/S0167-7012(98)00031-1.
- 589 Chen, R. *et al.* (2019) ‘Social cheating in a *Pseudomonas aeruginosa* quorum-sensing variant’,  
590 *Proceedings of the National Academy of Sciences of the United States of America*, 116(14), pp.  
591 7021–7026. doi: 10.1073/pnas.1819801116.
- 592 Coin, D. *et al.* (1997) ‘LasA, alkaline protease and elastase in clinical strains of *Pseudomonas*  
593 *aeruginosa*: Quantification by immunochemical methods’, *FEMS Immunology and Medical*  
594 *Microbiology*, 18(3), pp. 175–184. doi: 10.1016/S0928-8244(97)00037-0.
- 595 Cruz, R. L. *et al.* (2020) ‘RhlR-regulated acyl-homoserine lactone quorum sensing in a cystic  
596 fibrosis isolate of *Pseudomonas aeruginosa*’, *mBio*, 11(2). doi: 10.1128/mBio.00532-20.
- 597 D’Argenio, D. A. *et al.* (2007) ‘Growth phenotypes of *Pseudomonas aeruginosa lasR* mutants  
598 adapted to the airways of cystic fibrosis patients’, *Molecular Microbiology*, 64(2), pp. 512–533.  
599 doi: 10.1111/J.1365-2958.2007.05678.X.
- 600 Damkiær, S. *et al.* (2013) ‘Evolutionary remodeling of global regulatory networks during long-  
601 term bacterial adaptation to human hosts’, *Proceedings of the National Academy of Sciences of the*  
602 *United States of America*. Proc Natl Acad Sci U S A, 110(19), pp. 7766–7771. doi:  
603 10.1073/pnas.1221466110.
- 604 Dettman, J. R. *et al.* (2013) ‘Evolutionary genomics of epidemic and nonepidemic strains of  
605 *Pseudomonas aeruginosa*’, *Proceedings of the National Academy of Sciences of the United States*  
606 *of America*, 110(52), pp. 21065–21070. doi: 10.1073/pnas.1307862110.

- 607 Diggle, S. P. *et al.* (2007) ‘Cooperation and conflict in quorum-sensing bacterial populations’,  
608 *Nature*, 450(7168), pp. 411–414. doi: 10.1038/nature06279.
- 609 Feltner, J. B. *et al.* (2016) ‘LasR variant cystic fibrosis isolates reveal an adaptable quorum-sensing  
610 hierarchy in *Pseudomonas aeruginosa*’, *mBio*. American Society for Microbiology, 7(5), pp.  
611 e01513-16. doi: 10.1128/mBio.01513-16.
- 612 Figueiredo, A. R. T., Wagner, A. and Kümmerli, R. (2021) ‘Ecology drives the evolution of diverse  
613 social strategies in *Pseudomonas aeruginosa*’, *Molecular Ecology*. John Wiley & Sons, Ltd,  
614 30(20), pp. 5214–5228. doi: 10.1111/mec.16119.
- 615 Folkesson, A. *et al.* (2012) ‘Adaptation of *Pseudomonas aeruginosa* to the cystic fibrosis airway:  
616 an evolutionary perspective’, *Nature Reviews Microbiology* 2012 10:12. Nature Publishing Group,  
617 10(12), pp. 841–851. doi: 10.1038/nrmicro2907.
- 618 Gambello, M. J., Kaye, S. and Iglewski, B. H. (1993) ‘LasR of *Pseudomonas aeruginosa* is a  
619 transcriptional activator of the alkaline protease gene (*apr*) and an enhancer of exotoxin A  
620 expression’, *Infection and Immunity*, 61(4), pp. 1180–1184. doi: 10.1128/iai.61.4.1180-1184.1993.
- 621 Granato, E. T. *et al.* (2018) ‘Low spatial structure and selection against secreted virulence factors  
622 attenuates pathogenicity in *Pseudomonas aeruginosa*’, *ISME Journal*. Springer US, 12(12), pp.  
623 2907–2918. doi: 10.1038/s41396-018-0231-9.
- 624 Groleau, M. C. *et al.* (2021) ‘*Pseudomonas aeruginosa* isolates defective in function of the LasR  
625 quorum sensing regulator are frequent in diverse environmental niches’, *Environmental*  
626 *Microbiology*. John Wiley & Sons, Ltd. doi: 10.1111/1462-2920.15745.
- 627 Hammond, J. H. *et al.* (2016) ‘Environmentally Endemic *Pseudomonas aeruginosa* Strains with  
628 Mutations in *lasR* Are Associated with Increased Disease Severity in Corneal Ulcers’, *mSphere*.  
629 mSphere, 1(5). doi: 10.1128/msphere.00140-16.
- 630 Jansen, G. *et al.* (2015) ‘Evolutionary transition from pathogenicity to commensalism: Global  
631 regulator mutations mediate fitness gains through virulence attenuation’, *Molecular Biology and*  
632 *Evolution*. Mol Biol Evol, 32(11), pp. 2883–2896. doi: 10.1093/molbev/msv160.
- 633 Jayakumar, P. *et al.* (2021) ‘*Pseudomonas aeruginosa* reaches collective decisions via transient  
634 segregation of quorum sensing activities across cells’, *bioRxiv*, p. 2021.03.22.436499. doi:  
635 10.1101/2021.03.22.436499.

- 636 Koch, C. and Hoiby, N. (1993) 'Pathogenesis of cystic fibrosis', *The Lancet*. Elsevier, 341(8852),  
637 pp. 1065–1069. doi: 10.1016/0140-6736(93)92422-P.
- 638 Köhler, T., Buckling, A. and Van Delden, C. (2009) 'Cooperation and virulence of clinical  
639 *Pseudomonas aeruginosa* populations', *Proceedings of the National Academy of Sciences*.  
640 National Academy of Sciences, 106(15), pp. 6339–6344. doi: 10.1073/PNAS.0811741106.
- 641 Kostylev, M. *et al.* (2019) 'Evolution of the *Pseudomonas aeruginosa* quorum-sensing hierarchy',  
642 *Proceedings of the National Academy of Sciences of the United States of America*, 116(14), pp.  
643 7027–7032. doi: 10.1073/pnas.1819796116.
- 644 Kramer, J., López Carrasco, M. Á. and Kümmerli, R. (2020) 'Positive linkage between bacterial  
645 social traits reveals that homogeneous rather than specialised behavioral repertoires prevail in  
646 natural *Pseudomonas* communities', *FEMS Microbiology Ecology*. Oxford University Press, 96(1).  
647 doi: 10.1093/femsec/fiz185.
- 648 Lee, J. and Zhang, L. (2015) 'The hierarchy quorum sensing network in *Pseudomonas aeruginosa*',  
649 *Protein and Cell*, 6(1), pp. 26–41. doi: 10.1007/s13238-014-0100-x.
- 650 Lequette, Y. and Greenberg, E. P. (2005) 'Timing and localization of rhamnolipid synthesis gene  
651 expression in *Pseudomonas aeruginosa* biofilms.', *Journal of bacteriology*. American Society for  
652 Microbiology (ASM), 187(1), pp. 37–44. doi: 10.1128/JB.187.1.37-44.2005.
- 653 Lesprit, P. *et al.* (2003) 'Role of the quorum-sensing system in experimental pneumonia due to  
654 *Pseudomonas aeruginosa* in rats', *American journal of respiratory and critical care medicine*. Am  
655 J Respir Crit Care Med, 167(11), pp. 1478–1482. doi: 10.1164/RCCM.200207-736BC.
- 656 Liang, H. *et al.* (2014) 'Molecular mechanisms of master regulator VqsM mediating quorum-  
657 sensing and antibiotic resistance in *Pseudomonas aeruginosa*', *Nucleic Acids Research*. Oxford  
658 University Press, 42(16), p. 10307. doi: 10.1093/NAR/GKU586.
- 659 Marvig, R. L. *et al.* (2015) 'Convergent evolution and adaptation of *Pseudomonas aeruginosa*  
660 within patients with cystic fibrosis', *Nature Genetics*. Nature Publishing Group, 47(1), pp. 57–64.  
661 doi: 10.1038/ng.3148.
- 662 Morici, L. A. *et al.* (2007) '*Pseudomonas aeruginosa* AlgR Represses the Rhl Quorum-Sensing  
663 System in a Biofilm-Specific Manner', *Journal of Bacteriology*. American Society for  
664 Microbiology (ASM), 189(21), p. 7752. doi: 10.1128/JB.01797-06.

- 665 Mukherjee, S. *et al.* (2018) ‘The PqsE and RhIR proteins are an autoinducer synthase–receptor pair  
666 that control virulence and biofilm development in *Pseudomonas aeruginosa*’, *Proceedings of the*  
667 *National Academy of Sciences of the United States of America*. National Academy of Sciences,  
668 115(40), pp. E9411–E9418. doi: 10.1073/pnas.1814023115.
- 669 Nadal Jimenez, P. *et al.* (2012) ‘The Multiple Signaling Systems Regulating Virulence in  
670 *Pseudomonas aeruginosa*’, *Microbiology and Molecular Biology Reviews*, 76(1), pp. 46–65. doi:  
671 10.1128/membr.05007-11.
- 672 O’Brien, S. *et al.* (2017) ‘Adaptation to public goods cheats in *Pseudomonas aeruginosa*’,  
673 *Proceedings of the Royal Society B: Biological Sciences*. Royal Society Publishing, 284(1859).  
674 doi: 10.1098/rspb.2017.1089.
- 675 Oksanen, J. *et al.* (2020) ‘Package “vegan” Title Community Ecology Package Version 2.5-7’, *R*,  
676 2.5(7), pp. 1–286. Available at: [https://github.com/vegandevs/vegan/issues%5Cnhttps://cran.r-](https://github.com/vegandevs/vegan/issues%5Cnhttps://cran.r-project.org,%5Cnhttps://github.com/vegandevs/vegan)  
677 [project.org,%5Cnhttps://github.com/vegandevs/vegan](https://github.com/vegandevs/vegan) (Accessed: 24 January 2022).
- 678 Oshri, R. D. *et al.* (2018) ‘Selection for increased quorum-sensing cooperation in *Pseudomonas*  
679 *aeruginosa* through the shut-down of a drug resistance pump’, *The ISME Journal 2018 12:10*.  
680 Nature Publishing Group, 12(10), pp. 2458–2469. doi: 10.1038/s41396-018-0205-y.
- 681 Parkins, M. D., Somayaji, R. and Waters, V. J. (2018) ‘Epidemiology, biology, and impact of clonal  
682 *Pseudomonas aeruginosa* infections in cystic fibrosis’, *Clinical Microbiology Reviews*. American  
683 Society for Microbiology (ASM), 31(4). doi: 10.1128/CMR.00019-18.
- 684 Pearson, J. P. *et al.* (2000) ‘*Pseudomonas aeruginosa* cell-to-cell signaling is required for virulence  
685 in a model of acute pulmonary infection’, *Infection and immunity*. Infect Immun, 68(7), pp. 4331–  
686 4334. doi: 10.1128/IAI.68.7.4331-4334.2000.
- 687 Preston, M. J. *et al.* (1997) ‘Contribution of proteases and LasR to the virulence of *Pseudomonas*  
688 *aeruginosa* during corneal infections’, *Infection and immunity*. Infect Immun, 65(8), pp. 3086–  
689 3090. doi: 10.1128/IAI.65.8.3086-3090.1997.
- 690 Rezzoagli, C., Granato, E. T. and Kümmerli, R. (2020) ‘Harnessing bacterial interactions to  
691 manage infections: a review on the opportunistic pathogen *Pseudomonas aeruginosa* as a case  
692 example’, *Journal of Medical Microbiology*, 69, pp. 147–161. doi: 10.1099/jmm.0.001134.
- 693 Rumbaugh, K. P. *et al.* (1999) ‘Contribution of quorum sensing to the virulence of *Pseudomonas*

- 694 *aeruginosa* in burn wound infections’, *Infection and immunity*. Infect Immun, 67(11), pp. 5854–  
695 5862. doi: 10.1128/IAI.67.11.5854-5862.1999.
- 696 Rumbaugh, K. P. *et al.* (2009) ‘Quorum Sensing and the Social Evolution of Bacterial Virulence’,  
697 *Current Biology*. Curr Biol, 19(4), pp. 341–345. doi: 10.1016/j.cub.2009.01.050.
- 698 Savoia, D. and Zucca, M. (2007) ‘Clinical and environmental Burkholderia strains: biofilm  
699 production and intracellular survival’, *Current microbiology*. Curr Microbiol, 54(6), pp. 440–444.  
700 doi: 10.1007/S00284-006-0601-9.
- 701 Schaber, J. A. *et al.* (2004) ‘Analysis of quorum sensing-deficient clinical isolates of *Pseudomonas*  
702 *aeruginosa*’, *Journal of medical microbiology*. J Med Microbiol, 53(Pt 9), pp. 841–853. doi:  
703 10.1099/JMM.0.45617-0.
- 704 Schuster, M., Urbanowski, M. L. and Greenberg, E. P. (2004) *Promoter specificity in Pseudomonas*  
705 *aeruginosa* quorum sensing revealed by DNA binding of purified LasR, *Proceedings of the*  
706 *National Academy of Sciences of the United States of America*. doi: 10.1073/pnas.0407229101.
- 707 Scribner, M. R. *et al.* (2021) ‘The nutritional environment is sufficient to select coexisting biofilm  
708 and quorum-sensing mutants of *Pseudomonas aeruginosa*’, *bioRxiv*, p. 2021.09.01.458652. doi:  
709 10.1101/2021.09.01.458652.
- 710 Smalley, N. E. *et al.* (2022) ‘Evolution of the Quorum Sensing Regulon in Cooperating Populations  
711 of *Pseudomonas aeruginosa*’, *mBio*. Edited by M. Whiteley. American Society for  
712 Microbiology 1752 N St., N.W., Washington, DC, 13(1). doi: 10.1128/MBIO.00161-22.
- 713 Smith, E. E. *et al.* (2006) ‘Genetic adaptation by *Pseudomonas aeruginosa* to the airways of cystic  
714 fibrosis patients’, *Proceedings of the National Academy of Sciences*. National Academy of  
715 Sciences, 103(22), pp. 8487–8492. doi: 10.1073/PNAS.0602138103.
- 716 Tostado-Islas, O. *et al.* (2021) ‘Iron limitation by transferrin promotes simultaneous cheating of  
717 pyoverdine and exoprotease in *Pseudomonas aeruginosa*’, *The ISME Journal 2021 15:8*. Nature  
718 Publishing Group, 15(8), pp. 2379–2389. doi: 10.1038/s41396-021-00938-6.
- 719 Vanderwoude, J. *et al.* (2020) ‘ The evolution of virulence in *Pseudomonas aeruginosa* during  
720 chronic wound infection ’, *Proceedings of the Royal Society B: Biological Sciences*, 287(1937), p.  
721 20202272. doi: 10.1098/rspb.2020.2272.

722 West, S. A. *et al.* (2006) ‘Social evolution theory for microorganisms’, *Nature Reviews*  
723 *Microbiology*. Nature Publishing Group, 4(8), pp. 597–607. doi: 10.1038/nrmicro1461.

724 Wilder, C. N., Diggle, S. P. and Schuster, M. (2011) ‘Cooperation and cheating in *Pseudomonas*  
725 *aeruginosa*: the roles of the *las*, *rhl* and *pqs* quorum-sensing systems’, *The ISME Journal*. Nature  
726 Publishing Group, 5(8), pp. 1332–1343. doi: 10.1038/ismej.2011.13.

727 Williams, P. and Cámara, M. (2009) ‘Quorum sensing and environmental adaptation in  
728 *Pseudomonas aeruginosa*: a tale of regulatory networks and multifunctional signal molecules’,  
729 *Current Opinion in Microbiology*, 12(2), pp. 182–191. doi: 10.1016/j.mib.2009.01.005.

730 Winstanley, C., O’Brien, S. and Brockhurst, M. A. (2016) ‘*Pseudomonas aeruginosa* Evolutionary  
731 Adaptation and Diversification in Cystic Fibrosis Chronic Lung Infections.’, *Trends in*  
732 *microbiology*. Elsevier, 24(5), pp. 327–337. doi: 10.1016/j.tim.2016.01.008.

733

734

735

736

737

738

739

740

741

742

743

744

745

746

747

748 **Table 1: Mutations within each QS system.**

| <b>System</b> | <b>Gene</b>           | <b>Description</b>                 | <b>Number of clones</b> |
|---------------|-----------------------|------------------------------------|-------------------------|
| Las           | <i>lasI-rsaL-lasR</i> | Las signal, repressor and receptor | 29                      |
|               | <i>lasR</i>           | Las receptor                       | 6                       |
| Rhl           | <i>rhlR</i>           | Rhl receptor                       | 5                       |
| PQS           | <i>pqsABCD</i>        | PQS signal operon                  | 3                       |
|               | <i>pqsE</i>           | PQS signal operon                  | 4                       |
|               | <i>pqsR</i>           | PQS receptor                       | 21                      |

749

750

751

752

753

754

755

756

757

758

759

760

761

762

763

764

765

766

767



768

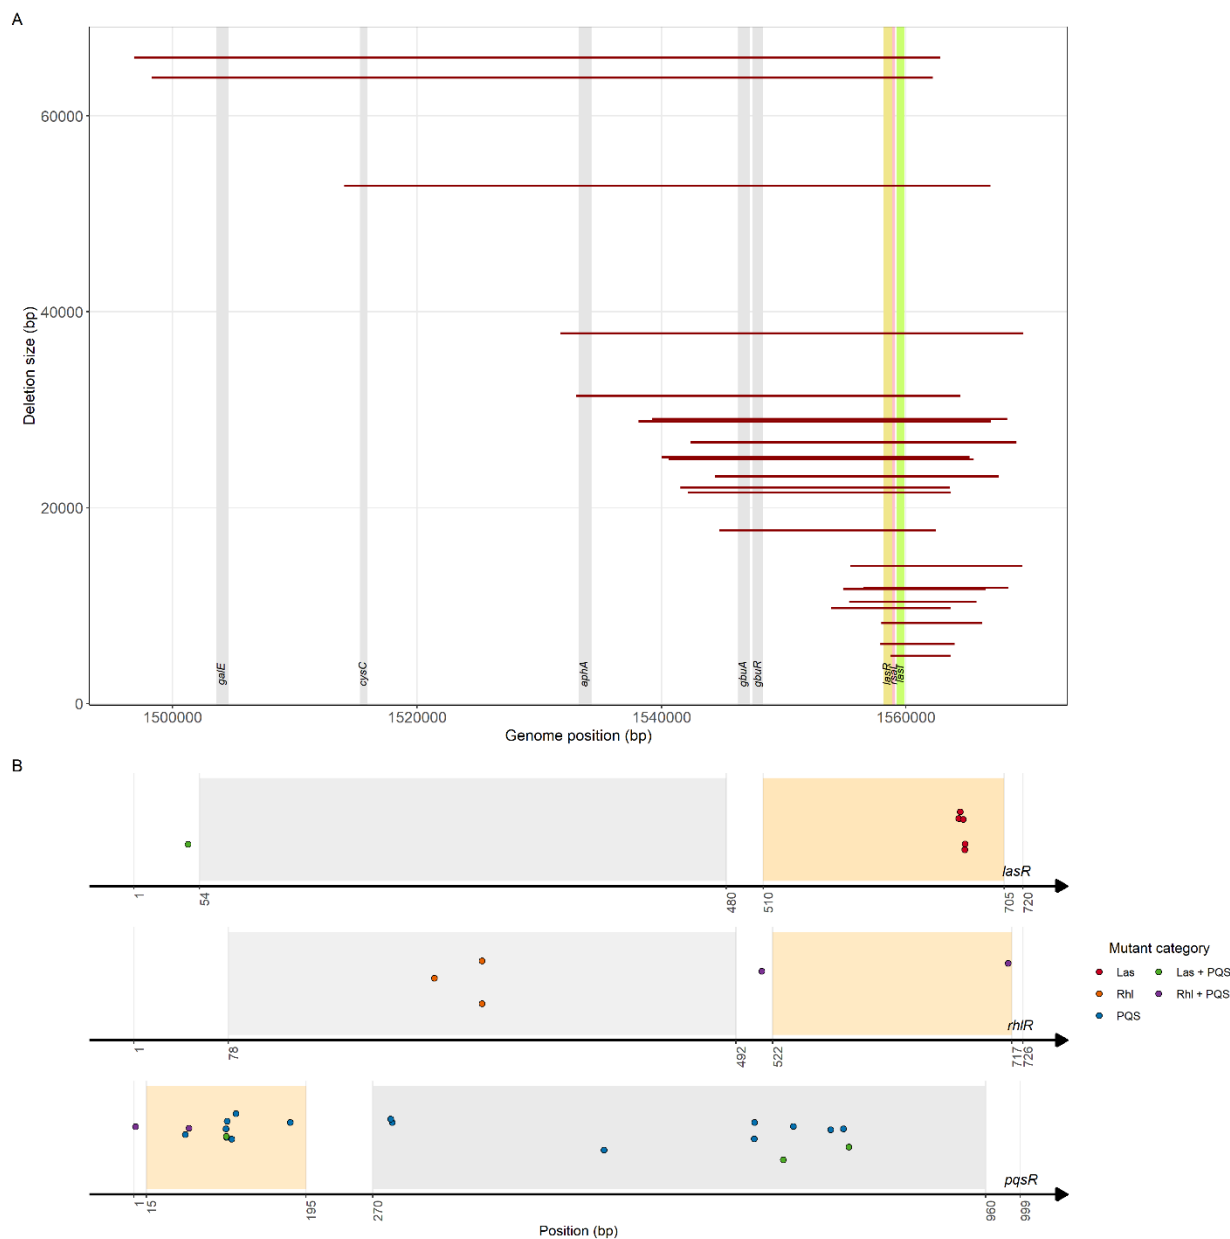

769

770 **Figure 1: Experimentally evolved mutations in the QS systems of *P. aeruginosa*.** (A) Size and position  
771 of large-scale deletions that include *lasI*, *rsaL* and *lasR* of the Las system. Shaded area represents position  
772 of genes in the genome. (B) Evolved mutations (SNPs and microindels) in the genes encoding the receptors  
773 of Las (*lasR* - 720 bp), Rhl (*rhlR* - 726bp) and PQS (*pqsR* - 999 bp) systems. Each dot represents the position  
774 of the mutated nucleotide within each gene. Grey and orange areas represent the ligand (i.e., signal)-binding  
775 and the DNA-binding domains, respectively.

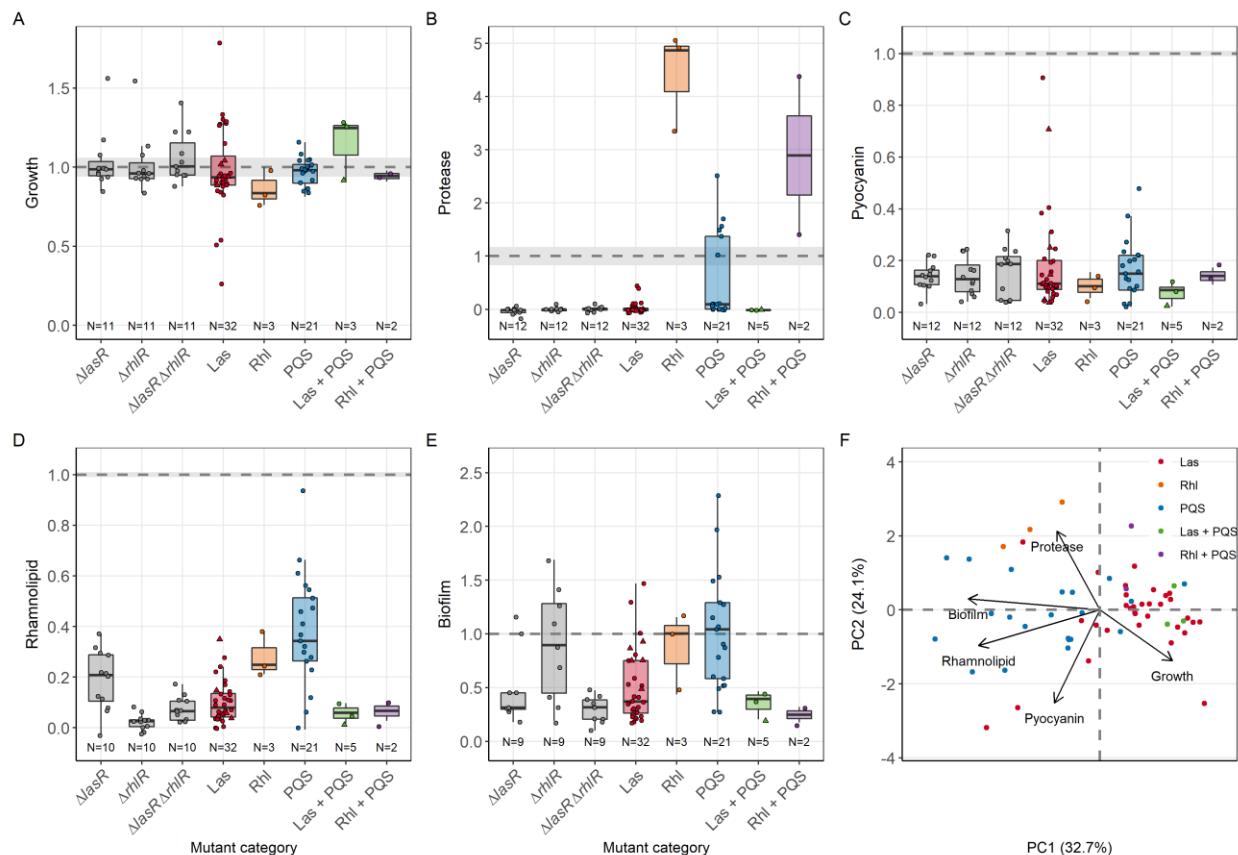

776

777 **Figure 2: Phenotypic profile of experimentally evolved *P. aeruginosa* isolates with mutations in the**  
 778 **QS regulon.** (A) Endpoint planktonic growth (OD at 600 nm) in LB medium after 24 hours, and production  
 779 of four QS-regulated traits: (B) protease, (C) pyocyanin, (D) rhamnolipid and (E) surface-attached biofilm  
 780 across clones with mutations in either a single (*Las*, *Rhl* or *PQS* systems) or in multiple QS systems (*Las* +  
 781 *PQS*, and *Rhl* + *PQS*). All values are expressed relative to the corresponding value of the ancestral PAO1  
 782 wild type strain (mean  $\pm$  standard error indicated as dotted lines and shaded areas, respectively). Lab-  
 783 generated QS mutants deficient in the production of either one of the two QS receptors, *LasR* ( $\Delta$ *LasR*), *RhlR*  
 784 ( $\Delta$ *rhlR*), or both receptors ( $\Delta$ *LasR* $\Delta$ *rhlR*) were used as controls for the production of QS-regulated traits in  
 785 loss-of-function mutants. (F) Principal component analysis (PCA) on growth and the production of the four  
 786 QS-regulated traits. Each data point represents the average of at least three independent replicates.

787

788

789

790

791

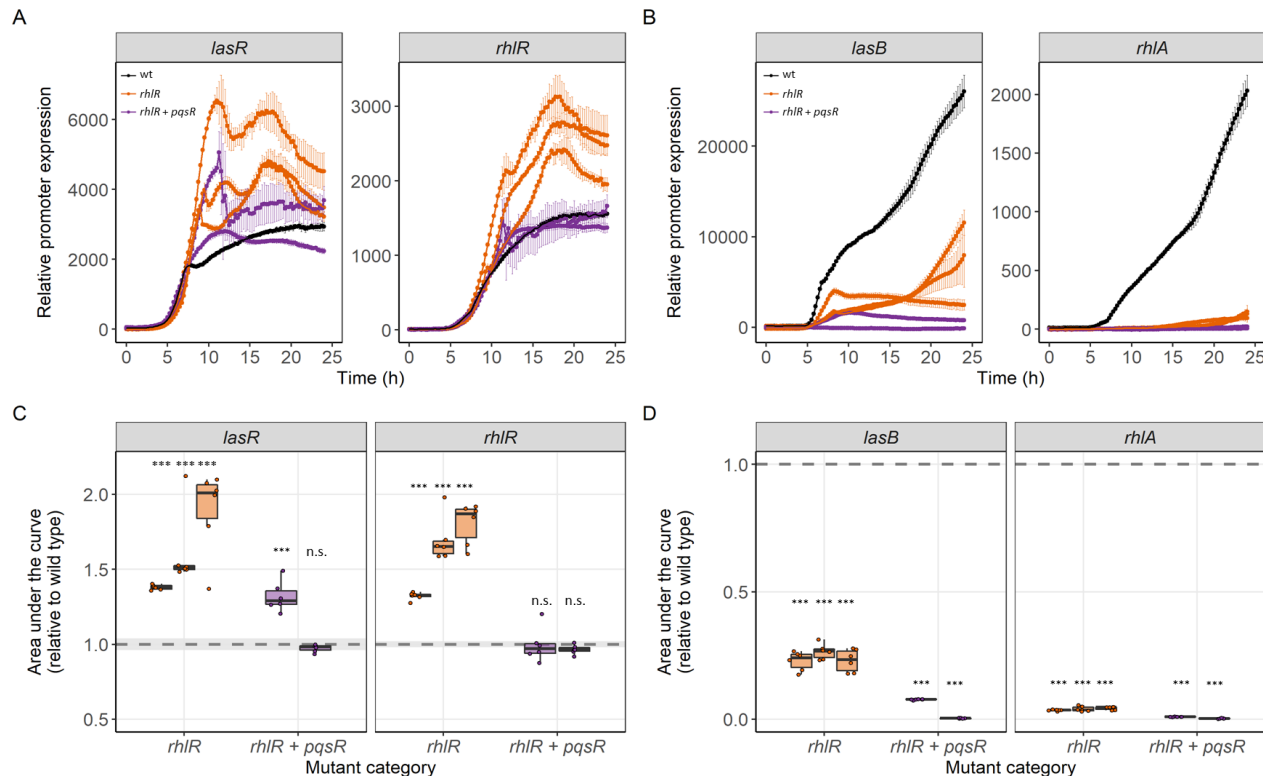

792

793 **Figure 3: Mutations in *rhIR* upregulates expression of the Las and Rhl receptors.** Gene expression  
 794 trajectories of (A) Las (*lasR*) and Rhl (*rhIR*) receptors, and (B) Las-regulated protease (*lasB*) and Rhl-  
 795 regulated rhamnolipid synthesis enzyme (*rhIA*) in clones with mutations in *rhIR* (orange) and *rhIR + pqsR*  
 796 (purple) shown as means  $\pm$  standard deviation. Gene expression in PAO1 wild type strain was used as  
 797 reference control (black). Gene expression was measured as mCherry or GFP fluorescence and reported as  
 798 fluorescence units, blank corrected by the background fluorescence of the wild type untagged strain. (C-D)  
 799 Area under the gene expression trajectory curves in individual clones (represented by boxplots), relative to  
 800 the gene expression in PAO1 wild type strain (dashed line at  $1.0 \pm$  standard deviation depicted as shaded  
 801 area). Data stem from 6 independent replicates per clone. Asterisks indicate whether area under the curve  
 802 is significantly different from the PAO1 wild type strain (based on post-hoc Tukey HSD: n.s. = not  
 803 significant, \*\*\*  $p < 0.001$ ).

804

805

806

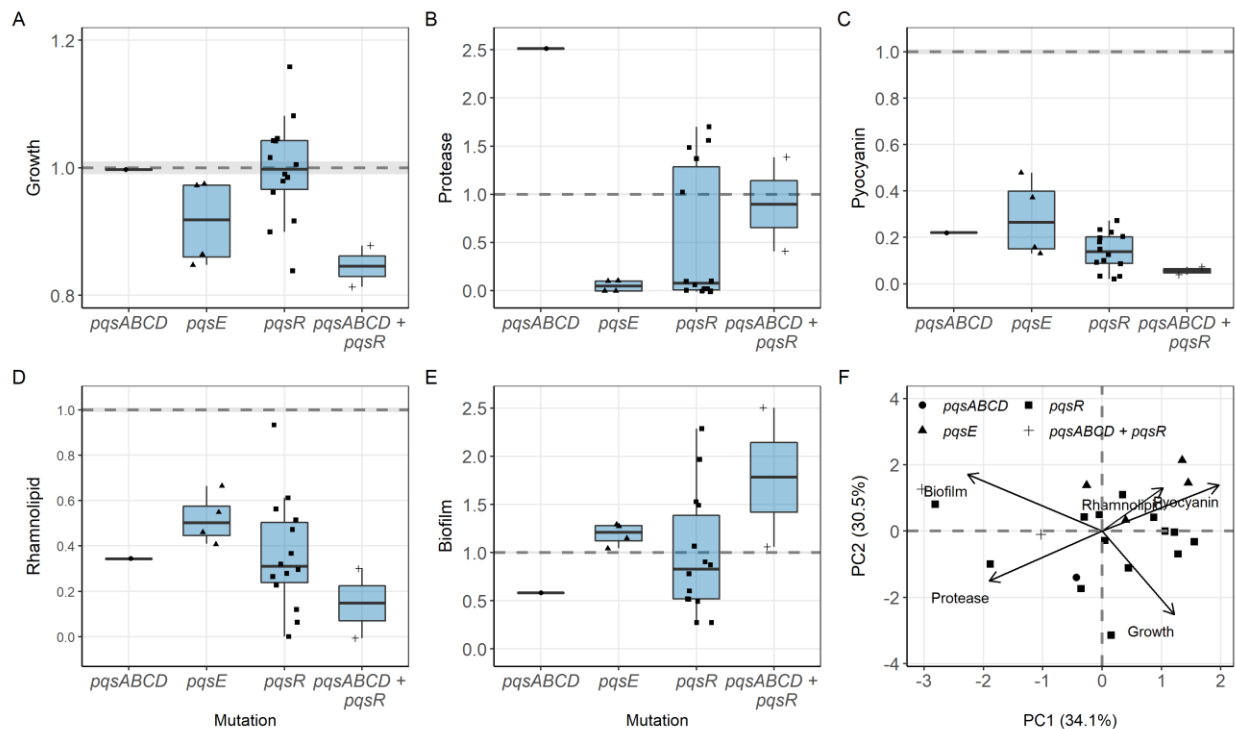

807  
808 **Figure 4. Phenotypes in PQS mutants and trade-offs in the production of QS-regulated traits.** (A)  
809 Endpoint planktonic growth (OD at 600nm) in LB medium after 24 hours, and production of four QS-  
810 regulated traits: (B) protease, (C) pyocyanin, (D) rhamnolipid and (E) surface-attached biofilm. The values  
811 of measured phenotypes are expressed relative to the corresponding value of the ancestral PAO1 wild type  
812 strain (mean  $\pm$  standard error indicated as dotted lines and shaded areas, respectively). (F) Principal  
813 component analysis (PCA) on the production of growth and four QS-regulated traits reveals significant  
814 clustering of mutant types and significant trade-offs (opposing vectors) between certain phenotypes. Each  
815 data point represents the average measure of at least three independent replicates per clone.

816

817

818

819

820

821

822

823

824 **SUPPLEMENTARY MATERIAL**

825 **Evolution of the quorum sensing regulon in *Pseudomonas aeruginosa* can involve both loss of**  
826 **function and network modulation**

827

828 Priyanikha Jayakumar<sup>1\*</sup>, Alexandre R. T. Figueiredo<sup>1,2,3</sup>, Rolf Kümmerli<sup>1\*</sup>

829

830 <sup>1</sup> Department of Quantitative Biomedicine, University of Zurich, Winterthurerstrasse 190, 8057

831 Zurich, Switzerland

832 <sup>2</sup> Department of Evolutionary Biology and Environmental Studies, University of Zurich,

833 Winterthurerstrasse 190, 8057 Zurich, Switzerland

834 <sup>3</sup> Department of Zoology, University of Oxford, 11a Mansfield Road, OX1 3SZ, Oxford, United

835 Kingdom

836

837 **\*Corresponding authors**

838 Priyanikha Jayakumar, [priyanikha.jayakumar@uzh.ch](mailto:priyanikha.jayakumar@uzh.ch); Rolf Kümmerli, [rolf.kuemmerli@uzh.ch](mailto:rolf.kuemmerli@uzh.ch)

839

840 **This file contains:**

841 Supplementary Figure 1

842 Supplementary Tables 1-6

843 Supplementary References

844

845

846

847

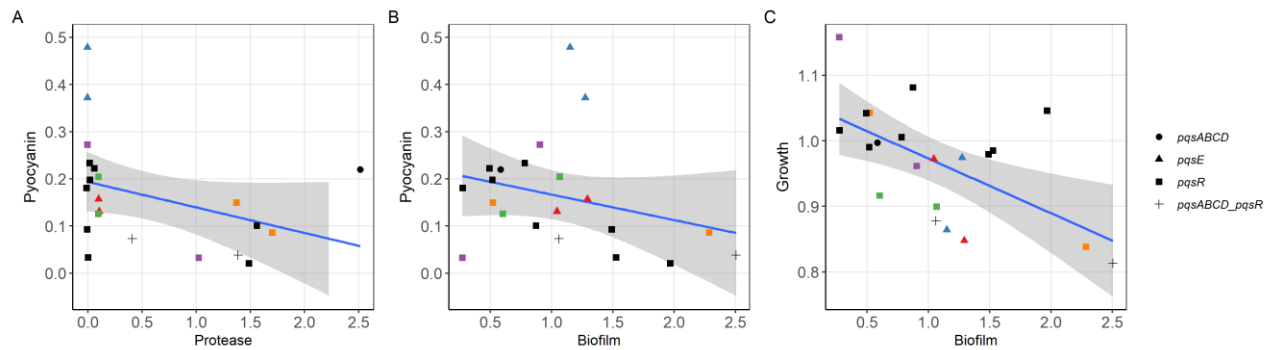

848

849 **Supplementary Figure 1: Trade-offs between traits in PQS mutants.** Associations are shown for (A)  
850 production of pyocyanin versus protease, (B) production of pyocyanin versus ability to form surface-  
851 attached biofilms, and (C) planktonic growth versus ability to form surface-attached biofilms. Coloured  
852 symbols represent clones originating from the same evolved population. All other clones are coloured black.  
853 Each data point represents the average measure of at least three independent replicates per clone. Grey  
854 shaded region represents 95% confidence interval.

855

856

857

858

859

860

861

862

863

864

865

866 **Table S1.** List of experimentally evolved *Pseudomonas aeruginosa* PAO1 strains

| Clone | Group | Gene                  | Description                        | Mutation     | Reference | Variant | Start position of mutation | Stop position of mutation | Size or position of mutation | Position on the gene | Amino acid residue |
|-------|-------|-----------------------|------------------------------------|--------------|-----------|---------|----------------------------|---------------------------|------------------------------|----------------------|--------------------|
| 1     | Las   | <i>lasI-rsaL-lasR</i> | Las signal, repressor and receptor | Big Deletion |           |         | 1540028                    | 1565202                   | 25174                        |                      |                    |
| 2     | Las   | <i>lasI-rsaL-lasR</i> | Las signal, repressor and receptor | Big Deletion |           |         | 1538124                    | 1566949                   | 28825                        |                      |                    |
| 3     | Las   | <i>lasI-rsaL-lasR</i> | Las signal, repressor and receptor | Big Deletion |           |         | 1541540                    | 1563604                   | 22064                        |                      |                    |
| 4     | Las   | <i>lasI-rsaL-lasR</i> | Las signal, repressor and receptor | Big Deletion |           |         | 1498290                    | 1562211                   | 63921                        |                      |                    |
| 5     | Las   | <i>lasI-rsaL-lasR</i> | Las signal, repressor and receptor | Big Deletion |           |         | 1498291                    | 1562211                   | 63920                        |                      |                    |
| 6     | Las   | <i>lasI-rsaL-lasR</i> | Las signal, repressor and receptor | Big Deletion |           |         | 1558737                    | 1563640                   | 4903                         |                      |                    |
| 7     | Las   | <i>lasI-rsaL-lasR</i> | Las signal, repressor and receptor | Big Deletion |           |         | 1555339                    | 1565763                   | 10424                        |                      |                    |
| 8     | Las   | <i>lasI-rsaL-lasR</i> | Las signal, repressor and receptor | Big Deletion |           |         | 1555455                    | 1569517                   | 14062                        |                      |                    |
| 9     | Las   | <i>lasI-rsaL-lasR</i> | Las signal, repressor and receptor | Big Deletion |           |         | 1555455                    | 1569516                   | 14061                        |                      |                    |
| 10    | Las   | <i>lasI-rsaL-lasR</i> | Las signal, repressor and receptor | Big Deletion |           |         | 1496833                    | 1562802                   | 65969                        |                      |                    |
| 11    | Las   | <i>lasI-rsaL-lasR</i> | Las signal, repressor and receptor | Big Deletion |           |         | 1531740                    | 1569561                   | 37821                        |                      |                    |
| 12    | Las   | <i>lasI-rsaL-lasR</i> | Las signal, repressor and receptor | Big Deletion |           |         | 1496833                    | 1562801                   | 65968                        |                      |                    |
| 13    | Las   | <i>lasI-rsaL-lasR</i> | Las signal, repressor and receptor | Big Deletion |           |         | 1553890                    | 1563643                   | 9753                         |                      |                    |
| 14    | Las   | <i>lasI-rsaL-lasR</i> | Las signal, repressor and receptor | Big Deletion |           |         | 1533017                    | 1564452                   | 31435                        |                      |                    |
| 15    | Las   | <i>lasI-rsaL-lasR</i> | Las signal, repressor and receptor | Big Deletion |           |         | 1544760                    | 1562460                   | 17700                        |                      |                    |
| 16    | Las   | <i>lasI-rsaL-lasR</i> | Las signal, repressor and receptor | Big Deletion |           |         | 1556546                    | 1568383                   | 11837                        |                      |                    |
| 17    | Las   | <i>lasI-rsaL-lasR</i> | Las signal, repressor and receptor | Big Deletion |           |         | 1556547                    | 1568384                   | 11837                        |                      |                    |
| 18    | Las   | <i>lasI-rsaL-lasR</i> | Las signal, repressor and receptor | Big Deletion |           |         | 1539213                    | 1568281                   | 29068                        |                      |                    |
| 19    | Las   | <i>lasI-rsaL-lasR</i> | Las signal, repressor and receptor | Big Deletion |           |         | 1557905                    | 1564000                   | 6095                         |                      |                    |
| 20    | Las   | <i>lasI-rsaL-lasR</i> | Las signal, repressor and receptor | Big Deletion |           |         | 1514042                    | 1566917                   | 52875                        |                      |                    |
| 21    | Las   | <i>lasI-rsaL-lasR</i> | Las signal, repressor and receptor | Big Deletion |           |         | 1531740                    | 1569561                   | 37821                        |                      |                    |
| 22    | Las   | <i>lasI-rsaL-lasR</i> | Las signal, repressor and receptor | Big Deletion |           |         | 1544367                    | 1567581                   | 23214                        |                      |                    |
| 23    | Las   | <i>lasI-rsaL-lasR</i> | Las signal, repressor and receptor | Big Deletion |           |         | 1544366                    | 1567581                   | 23215                        |                      |                    |
| 24    | Las   | <i>lasI-rsaL-lasR</i> | Las signal, repressor and receptor | Big Deletion |           |         | 1542363                    | 1569062                   | 26699                        |                      |                    |
| 25    | Las   | <i>lasI-rsaL-lasR</i> | Las signal, repressor and receptor | Big Deletion |           |         | 1542140                    | 1563698                   | 21558                        |                      |                    |
| 26    | Las   | <i>lasI-rsaL-lasR</i> | Las signal, repressor and receptor | Big Deletion |           |         | 1554842                    | 1566542                   | 11700                        |                      |                    |
| 27    | Las   | <i>lasI-rsaL-lasR</i> | Las signal, repressor and receptor | Big Deletion |           |         | 1554842                    | 1566543                   | 11701                        |                      |                    |

| Clone | Group | Gene        | Description       | Mutation | Reference                  | Variant        | Start position of mutation | Stop position of mutation | Size or position of mutation | Position on the gene | Amino acid residue |
|-------|-------|-------------|-------------------|----------|----------------------------|----------------|----------------------------|---------------------------|------------------------------|----------------------|--------------------|
| 28    | Las   | <i>lasR</i> | Las receptor      | SNP      | T                          | G              | 1558837                    | 1558837                   | 1558837                      | 669                  | 223                |
| 29    | Las   | <i>lasR</i> | Las receptor      | SNP      | T                          | G              | 1558837                    | 1558837                   | 1558837                      | 669                  | 223                |
| 30    | Las   | <i>lasR</i> | Las receptor      | SNP      | C                          | T              | 1558840                    | 1558840                   | 1558840                      | 672                  | 224                |
| 31    | Las   | <i>lasR</i> | Las receptor      | SNP      | C                          | T              | 1558840                    | 1558840                   | 1558840                      | 672                  | 224                |
| 32    | Las   | <i>lasR</i> | Las receptor      | SNP      | C                          | T              | 1558840                    | 1558840                   | 1558840                      | 672                  | 224                |
| 33    | Rhl   | <i>rhlR</i> | Rhl receptor      | SNP      | A                          | G              | 3890367                    | 3890367                   | 3890367                      | 285                  | 95                 |
| 34    | Rhl   | <i>rhlR</i> | Rhl receptor      | SNP      | A                          | G              | 3890367                    | 3890367                   | 3890367                      | 285                  | 95                 |
| 35    | Rhl   | <i>rhlR</i> | Rhl receptor      | SNP      | G                          | A              | 3890407                    | 3890407                   | 3890407                      | 246                  | 82                 |
| 36    | PQS   | <i>pqsR</i> | PQS receptor      | SNP      | A                          | G              | 1086473                    | 1086473                   | 1086473                      | 60                   | 20                 |
|       |       | <i>pqsB</i> | PQS signal operon | INDEL    | AGGGG                      | AGGG           | 1080061                    | 1080061                   | 1080061                      | 624                  | 208                |
| 37    | PQS   | <i>pqsR</i> | PQS receptor      | SNP      | C                          | T              | 1086399                    | 1086399                   | 1086399                      | 699                  | 233                |
|       |       | <i>pqsC</i> | PQS signal operon | SNP      | A                          | G              | 1081318                    | 1081318                   | 1081318                      | 468                  | 156                |
| 38    | PQS   | <i>pqsD</i> | PQS signal operon | SNP      | C                          | A              | 1082220                    | 1082220                   | 1082220                      | 279                  | 93                 |
| 39    | PQS   | <i>pqsE</i> | PQS signal operon | SNP      | G                          | A              | 1082951                    | 1082951                   | 1082951                      | 3                    | 1                  |
| 40    | PQS   | <i>pqsE</i> | PQS signal operon | SNP      | G                          | A              | 1082951                    | 1082951                   | 1082951                      | 3                    | 1                  |
| 41    | PQS   | <i>pqsE</i> | PQS signal operon | SNP      | T                          | C              | 1083111                    | 1083111                   | 1083111                      | 165                  | 55                 |
| 42    | PQS   | <i>pqsE</i> | PQS signal operon | SNP      | T                          | C              | 1083111                    | 1083111                   | 1083111                      | 165                  | 55                 |
| 43    | PQS   | <i>pqsR</i> | PQS receptor      | SNP      | A                          | G              | 1086806                    | 1086806                   | 1086806                      | 291                  | 97                 |
| 44    | PQS   | <i>pqsR</i> | PQS receptor      | SNP      | A                          | G              | 1086806                    | 1086806                   | 1086806                      | 291                  | 97                 |
| 45    | PQS   | <i>pqsR</i> | PQS receptor      | SNP      | A                          | G              | 1086987                    | 1086987                   | 1086987                      | 111                  | 37                 |
| 46    | PQS   | <i>pqsR</i> | PQS receptor      | INDEL    | GTT                        | GT             | 1086354                    | 1086355                   | 1086354                      | 744                  | 248                |
| 47    | PQS   | <i>pqsR</i> | PQS receptor      | SNP      | A                          | G              | 1086980                    | 1086980                   | 1086980                      | 117                  | 39                 |
| 48    | PQS   | <i>pqsR</i> | PQS receptor      | INDEL    | ACC                        | AC             | 1086298                    | 1086299                   | 1086296                      | 801                  | 267                |
| 49    | PQS   | <i>pqsR</i> | PQS receptor      | INDEL    | TGCTGACCGCC<br>GAGCTGACCGC | TGCTGACC<br>GC | 1086985                    | 1086997                   | 1086991                      | 105                  | 34 - 37            |
| 50    | PQS   | <i>pqsR</i> | PQS receptor      | INDEL    | TGCTGACCGCC<br>GAGCTGACCGC | TGCTGACC<br>GC | 1086985                    | 1086997                   | 1086991                      | 105                  | 34 - 37            |
| 51    | PQS   | <i>pqsR</i> | PQS receptor      | SNP      | C                          | T              | 1086399                    | 1086399                   | 1086399                      | 699                  | 233                |
| 52    | PQS   | <i>pqsR</i> | PQS receptor      | SNP      | C                          | T              | 1086311                    | 1086311                   | 1086311                      | 786                  | 262                |
| 53    | PQS   | <i>pqsR</i> | PQS receptor      | SNP      | T                          | G              | 1086919                    | 1086919                   | 1086919                      | 177                  | 59                 |



|    |              |                       |                                    |              |                            |                |         |         |         |     |         |
|----|--------------|-----------------------|------------------------------------|--------------|----------------------------|----------------|---------|---------|---------|-----|---------|
| 54 | PQS          | <i>pqsR</i>           | PQS receptor                       | INDEL        | TGCTGACCGCC<br>GAGCTGACCGC | TGCTGACC<br>GC | 1086985 | 1086997 | 1086991 | 105 | 34 - 37 |
| 55 | PQS          | <i>pqsR</i>           | PQS receptor                       | INDEL        | TGCTGACCGCC<br>GAGCTGACCGC | TGCTGACC<br>GC | 1086985 | 1086997 | 1086991 | 105 | 34 - 37 |
| 56 | PQS          | <i>pqsR</i>           | PQS receptor                       | INDEL        | CGGG                       | CGG            | 1086568 | 1086569 | 1086568 | 531 | 177     |
| 57 | Las +<br>PQS | <i>lasI-rsaL-lasR</i> | Las signal, repressor and receptor | Big Deletion |                            |                | 1557989 | 1566221 | 8232    |     |         |
|    | Las +<br>PQS | <i>pqsR</i>           | PQS receptor                       | SNP          | C                          | A              | 1086366 | 1086366 | 1086366 | 732 | 244     |
| 58 | Las +<br>PQS | <i>lasI-rsaL-lasR</i> | Las signal, repressor and receptor | Big Deletion |                            |                | 1540616 | 1565563 | 24947   |     |         |
|    | Las +<br>PQS | <i>pqsR</i>           | PQS receptor                       | SNP          | G                          | T              | 1086289 | 1086289 | 1086289 | 807 | 269     |
| 59 | Las +<br>PQS | <i>lasR</i>           | Las receptor                       | SNP          | G                          | T              | 1558213 | 1558213 | 1558213 | 45  | 15      |
|    | Las +<br>PQS | <i>pqsR</i>           | PQS receptor                       | INDEL        | TGCTGACCGCC<br>GAGCTGACCGC | TGCTGACC<br>GC | 1086985 | 1086997 | 1086991 | 105 | 34 - 37 |
| 60 | Rhl +<br>PQS | <i>rhlR</i>           | Rhl receptor                       | SNP          | T                          | C              | 3890139 | 3890139 | 3890139 | 513 | 171     |
|    | Rhl +<br>PQS | <i>pqsR</i>           | PQS receptor                       | SNP          | A                          | G              | 1087034 | 1087034 | 1087034 | 63  | 21      |
| 61 | Rhl +<br>PQS | <i>rhlR</i>           | Rhl receptor                       | SNP          | A                          | T              | 3889938 | 3889938 | 3889938 | 714 | 238     |
|    | Rhl +<br>PQS | <i>pqsR</i>           | PQS receptor                       | SNP          | C                          | T              | 1087093 | 1087093 | 1087093 | 3   | 1       |

867

868

869

870

871

872

873

874

875 **Table S2.** List of defined bacterial strains and plasmids used for strain construction and for control  
 876 experiments.

| Strains                                        | Description                                                                                                                                                                                              | Source or reference             |
|------------------------------------------------|----------------------------------------------------------------------------------------------------------------------------------------------------------------------------------------------------------|---------------------------------|
| <b><i>E. coli</i></b>                          |                                                                                                                                                                                                          |                                 |
| CC118 $\lambda$ pir                            | $\Delta$ ( <i>ara, leu</i> ) <sub>7697</sub> <i>araD</i> 139 $\Delta$ <i>lacX</i> 74 <i>galE galK phoA</i> 20 <i>thi-1 rpsE rpoB</i> (Rf <sup>R</sup> ) <i>argE(am) recA1</i> $\lambda$ pir <sup>+</sup> | De Lorenzo <i>et al.</i> , 1990 |
| <b><i>Pseudomonas aeruginosa</i></b>           |                                                                                                                                                                                                          |                                 |
| PAO1 wild type                                 | Wild type strain (ATCC 15692)                                                                                                                                                                            | This laboratory                 |
| PAO1 $\Delta$ <i>lasR</i>                      | Deficient in the receptor of Las system                                                                                                                                                                  | This laboratory                 |
| PAO1 $\Delta$ <i>rhlR</i>                      | Deficient in the receptor of Rhl system                                                                                                                                                                  | This laboratory                 |
| PAO1 $\Delta$ <i>lasR</i> $\Delta$ <i>rhlR</i> | Deficient in the receptor of both Las and Rhl systems                                                                                                                                                    | This laboratory                 |
| <b>Plasmids</b>                                |                                                                                                                                                                                                          |                                 |
| pUX-BF13                                       | Helper plasmid to provide Tn7 transposase proteins for reporter construct integration at the <i>attTn7</i> site in <i>P. aeruginosa</i>                                                                  | Bao <i>et al.</i> , 1991        |
| pDR05                                          | pUC18-mini-Tn7-Gm with <i>lasR-GFP</i> and <i>rhlR-mCherry</i>                                                                                                                                           | Jayakumar <i>et al.</i> , 2021  |
| pDR06                                          | pUC18-mini-Tn7-Gm with <i>lasB-GFP</i> and <i>rhlA-mCherry</i>                                                                                                                                           | Jayakumar <i>et al.</i> , 2021  |

877

878

879

880 **Table S3:** Loadings of phenotypic variables onto the principal components (PCs).

|                        | PC1     | PC2     | PC3     | PC4     | PC5     |
|------------------------|---------|---------|---------|---------|---------|
| Growth                 | 0.3557  | -0.3695 | 0.7588  | 0.2855  | 0.2823  |
| Protease               | -0.2117 | 0.5752  | 0.5797  | -0.5369 | 0.0043  |
| Pyocyanin              | -0.2236 | -0.6773 | -0.0374 | -0.6764 | 0.1800  |
| Rhamnolipid            | -0.5975 | -0.2593 | 0.293   | 0.269   | -0.6462 |
| Biofilm                | -0.6494 | 0.0819  | -0.0301 | 0.3168  | 0.6858  |
| Explained variance (%) | 32.9    | 24.6    | 18.3    | 14.7    | 9.5     |

881

882

883 **Table S4:** List of fluorescent gene reporter strains

884

| Strains                                                                | Description                                                                           | Source or reference            |
|------------------------------------------------------------------------|---------------------------------------------------------------------------------------|--------------------------------|
| PAO1 wild type<br><i>promoterless-GFP and mCherry</i>                  | Non-fluorescent wild type strain with an empty promoter site fused to GFP and mCherry | Jayakumar <i>et al.</i> , 2021 |
| <b>Evolved <i>rhlR</i> mutants</b>                                     |                                                                                       |                                |
| Clone 33- <i>lasR-gfp-rhlR-mCherry</i>                                 | Transcriptional fusion of <i>lasR-GFP</i> and <i>rhlR-mCherry</i> from pDR05          | This study                     |
| Clone 33- <i>lasB-gfp-rhlA-mCherry</i>                                 | Transcriptional fusion <i>lasB-GFP</i> and <i>rhlA-mCherry</i> from pDR06             | This study                     |
| Clone 34- <i>lasR-gfp-rhlR-mCherry</i>                                 | Transcriptional fusion of <i>lasR-GFP</i> and <i>rhlR-mCherry</i> from pDR05          | This study                     |
| Clone 34- <i>lasB-gfp-rhlA-mCherry</i>                                 | Transcriptional fusion <i>lasB-GFP</i> and <i>rhlA-mCherry</i> from pDR06             | This study                     |
| Clone 35- <i>lasR-gfp-rhlR-mCherry</i>                                 | Transcriptional fusion of <i>lasR-GFP</i> and <i>rhlR-mCherry</i> from pDR05          | This study                     |
| Clone 35- <i>lasB-gfp-rhlA-mCherry</i>                                 | Transcriptional fusion <i>lasB-GFP</i> and <i>rhlA-mCherry</i> from pDR06             | This study                     |
| <b>Evolved <i>rhlR</i> mutants containing mutations in <i>pqsR</i></b> |                                                                                       |                                |
| Clone 62- <i>lasR-gfp-rhlR-mCherry</i>                                 | Transcriptional fusion of <i>lasR-GFP</i> and <i>rhlR-mCherry</i> from pDR05          | This study                     |
| Clone 62- <i>lasB-gfp-rhlA-mCherry</i>                                 | Transcriptional fusion <i>lasB-GFP</i> and <i>rhlA-mCherry</i> from pDR06             | This study                     |
| Clone 63- <i>lasR-gfp-rhlR-mCherry</i>                                 | Transcriptional fusion of <i>lasR-GFP</i> and <i>rhlR-mCherry</i> from pDR05          | This study                     |
| Clone 63- <i>lasB-gfp-rhlA-mCherry</i>                                 | Transcriptional fusion <i>lasB-GFP</i> and <i>rhlA-mCherry</i> from pDR06             | This study                     |

885 **Table S5:** Loadings of phenotypic variables of *pqs* mutants onto the principal components (PCs).

|                        | PC1     | PC2     | PC3     | PC4     | PC5     |
|------------------------|---------|---------|---------|---------|---------|
| Growth                 | 0.3119  | -0.6463 | 0.3768  | 0.0073  | 0.5856  |
| Protease               | -0.4887 | -0.3860 | 0.1128  | -0.7395 | -0.2291 |
| Pyocyanin              | 0.5054  | 0.3571  | -0.2834 | -0.6613 | 0.3153  |
| Rhamnolipid            | 0.2635  | 0.3355  | 0.8406  | -0.1252 | -0.3094 |
| Biofilm                | -0.5822 | 0.4396  | 0.2416  | -0.0061 | 0.6398  |
| Explained variance (%) | 34.1    | 30.5    | 19.4    | 12.6    | 3.5     |

886

887

888

889 **Table S6:** Clones with mutations in the PQS regulator (*pqsR*)

| Clone number | Protease production | Protein Domain | Mutation type                  |
|--------------|---------------------|----------------|--------------------------------|
| 36           | Low                 | DBD            | Frameshift                     |
| 43           | Low                 | LBD            | Missense                       |
| 44           | Low                 | LBD            | Missense                       |
| 45           | Low                 | DBD            | Missense                       |
| 47           | Low                 | DBD            | Missense                       |
| 48           | Low                 | LBD            | Frameshift                     |
| 49           | Low                 | DBD            | Conservative in-frame deletion |
| 52           | Low                 | LBD            | Missense                       |
| 53           | Low                 | DBD            | Missense                       |
| 56           | Low                 | LBD            | Frameshift                     |
| 37           | High                | DBD            | Missense                       |
| 46           | High                | DBD            | Frameshift                     |
| 50           | High                | LBD            | Conservative in-frame deletion |
| 51           | High                | DBD            | Missense                       |
| 54           | High                | LBD            | Conservative in-frame deletion |
| 55           | High                | LBD            | Conservative in-frame deletion |

890 \*LBD: Ligand-binding domain; DBD: DNA-binding domain

891

892

893 **Supplementary References**

894 Bao, Y. *et al.* (1991) ‘An improved Tn7-based system for the single-copy insertion of cloned  
895 genes into chromosomes of gram-negative bacteria’, *Gene*. *Gene*, 109(1), pp. 167–168. doi:  
896 10.1016/0378-1119(91)90604-A.

897 Jayakumar, P. *et al.* (2021) ‘Pseudomonas aeruginosa reaches collective decisions via transient  
898 segregation of quorum sensing activities across cells’, *bioRxiv*, p. 2021.03.22.436499. doi:  
899 10.1101/2021.03.22.436499.

900 De Lorenzo, V. *et al.* (1990) ‘Mini-Tn5 transposon derivatives for insertion mutagenesis,  
901 promoter probing, and chromosomal insertion of cloned DNA in gram-negative eubacteria’,  
902 *Journal of Bacteriology*. American Society for Microbiology Journals, 172(11), pp. 6568–6572.  
903 doi: 10.1128/jb.172.11.6568-6572.1990.

904
